# Supplementary material for: Mapping Global Resource-Driven Nature Loss in the Mining Sector
Source: Research Square preprint supplement (doi:10.21203/rs.3.rs-5856043/v1), 2025-02-26
Supplement: Supplementary file 1 [file 398973abf9ec2748f0a763c0.pdf]

**SI Appendix for**  
**“Mapping Global Resource-Driven Nature Loss in the Mining Sector”**

Yu-Tong Cheng<sup>1</sup>, Nguyen Tien Hoang<sup>1</sup>, Yushin Shinoda<sup>2</sup>, Kamrul Islam<sup>3</sup>, Masaharu Motoshita<sup>3</sup>, Taku Kadoya<sup>2</sup>, Keiichiro Kanemoto<sup>1,4\*</sup>

Contents:

|                                                                                |    |
|--------------------------------------------------------------------------------|----|
| S1. Deforestation Areas for 20 Commodities.....                                | 1  |
| S2. Global Distribution of Mining Areas for 20 Commodities.....                | 2  |
| S3. Spatial Variation in Deforestation-to-Mining Area Ratio for 20 Commodities | 9  |
| S4. Region-Commodity Combination.....                                          | 16 |
| S5. Spatial Variation in Extinction Risk Index (ERI) for 20 Commodities.....   | 17 |
| S6. Data Sources and Preparation.....                                          | 24 |
| S7. Open-pit Identification.....                                               | 26 |
| S8. Commodity Classification.....                                              | 28 |

---

<sup>1</sup>Graduate School of Environmental Studies, Tohoku University, Sendai, Japan.

<sup>2</sup>Biodiversity Division, National Institute for Environmental Studies (NIES), Ibaraki, Japan.

<sup>3</sup>Research Institute of Science for Safety and Sustainability, National Institute of Advanced Industrial Science and Technology, Tsukuba, Japan.

<sup>4</sup>Interdisciplinary Cluster for Cutting Edge Research, Shinshu University, Matsumoto, Japan.

\*Corresponding author. E-mail: keiichiro.kanemoto@gmail.com

## S1. Deforestation Areas for 20 Commodities

| Commodity           | Area (Km <sup>2</sup> ) | Proportion (%) |
|---------------------|-------------------------|----------------|
| Iron                | 1046.01                 | 7.16%          |
| Copper              | 523.89                  | 3.58%          |
| Lead                | 116.74                  | 0.80%          |
| Zinc                | 61.41                   | 0.42%          |
| Gold                | 3183.65                 | 21.78%         |
| Silver              | 62.94                   | 0.43%          |
| Chromium            | 17.45                   | 0.12%          |
| Manganese           | 135.55                  | 0.93%          |
| Molybdenum          | 168.43                  | 1.15%          |
| Nickel and Cobalt   | 616.79                  | 4.22%          |
| Tin                 | 84.34                   | 0.58%          |
| Tungsten            | 11.48                   | 0.08%          |
| Aluminium (Bauxite) | 764.71                  | 5.23%          |
| Ilmenite            | 58.40                   | 0.40%          |
| Lithium             | 245.95                  | 1.68%          |
| PGE                 | 113.83                  | 0.78%          |
| Uranium             | 95.73                   | 0.65%          |
| Other metals        | 196.41                  | 1.34%          |
| Coal                | 6044.75                 | 41.35%         |
| Other non-metals    | 1070.57                 | 7.32%          |
| ALL                 | 14619.05                | 100%           |



S2. Global Distribution of Mining Areas for 20 Commodities

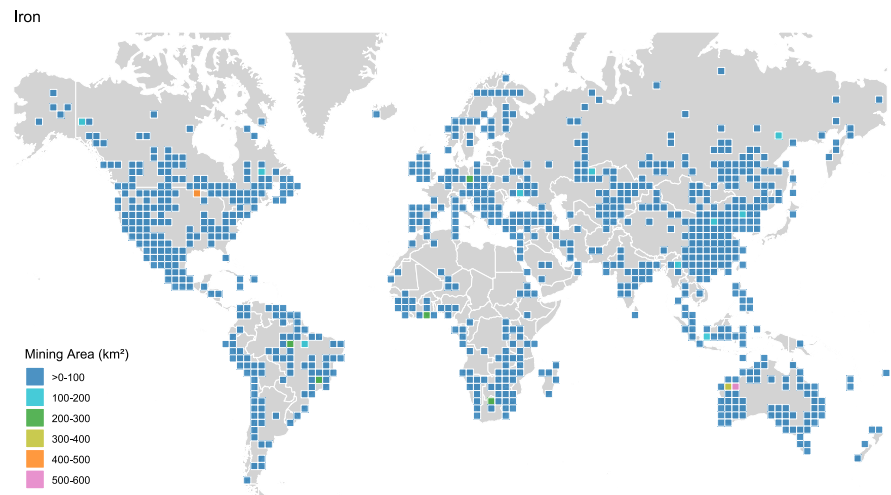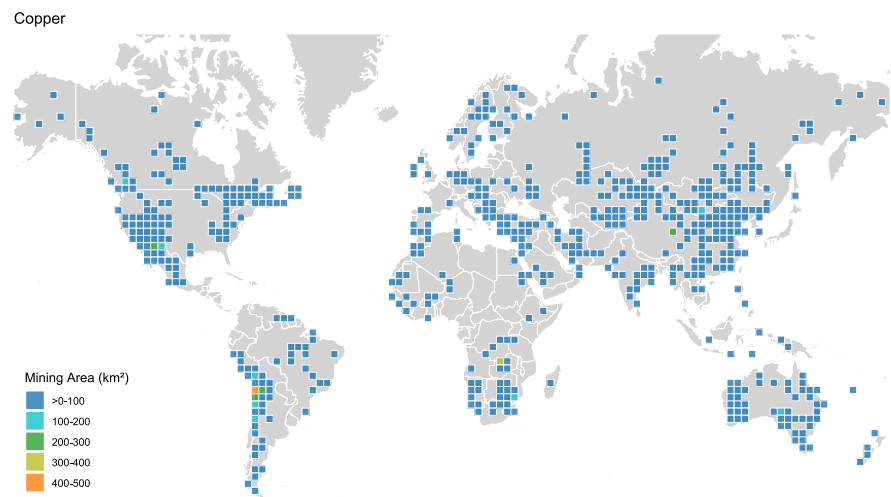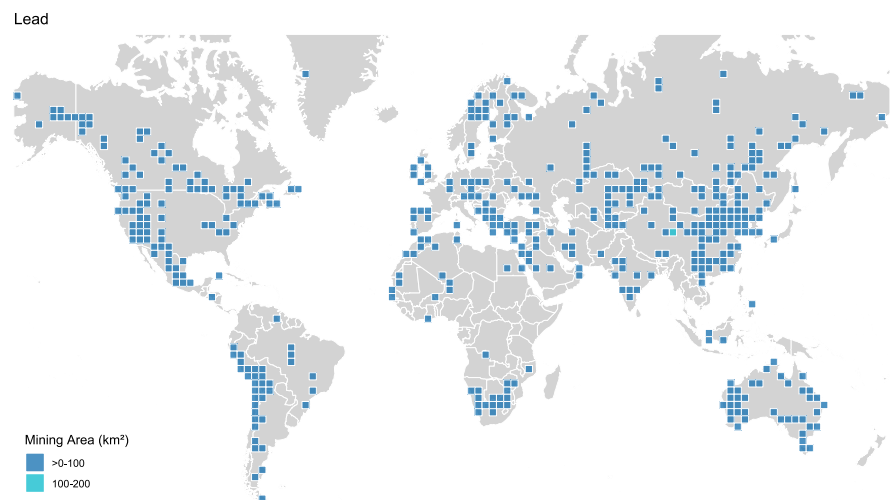

### Zinc

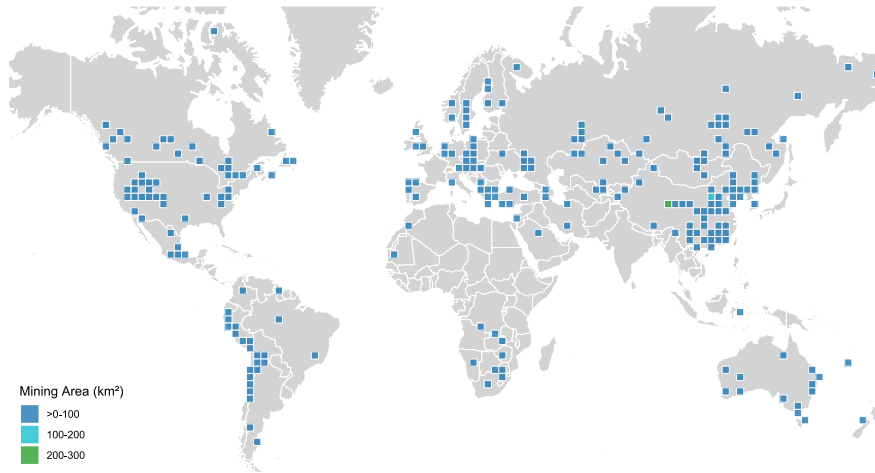

### Gold

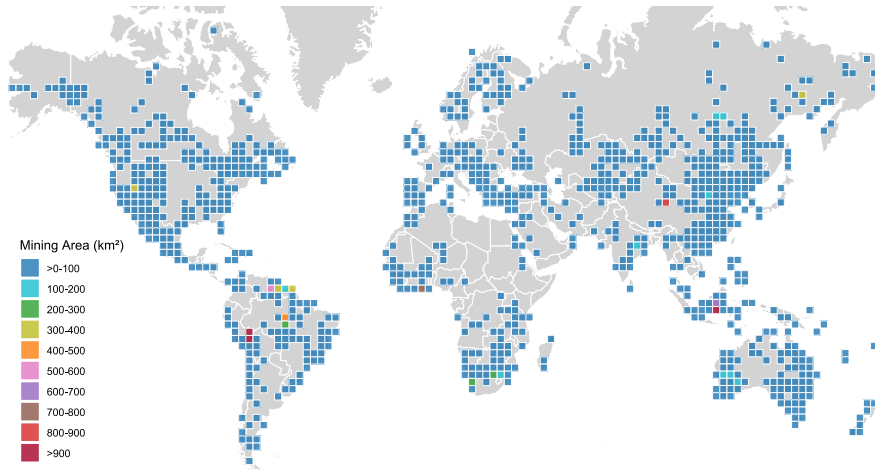

### Silver

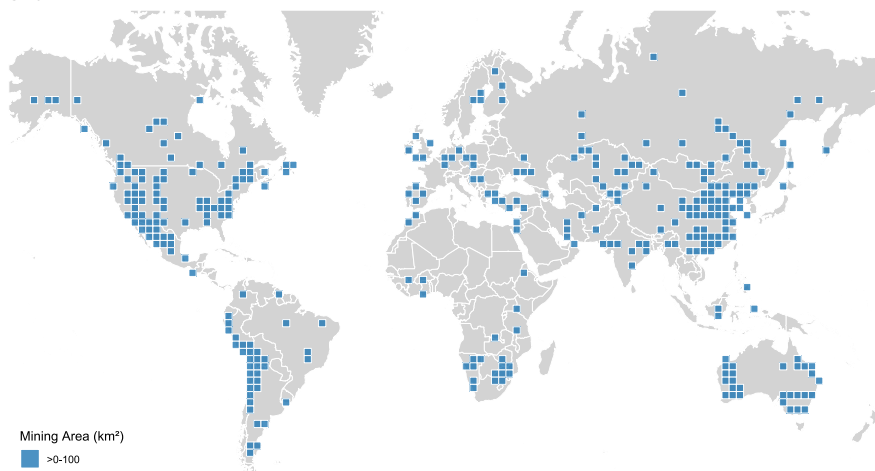

### Chromium

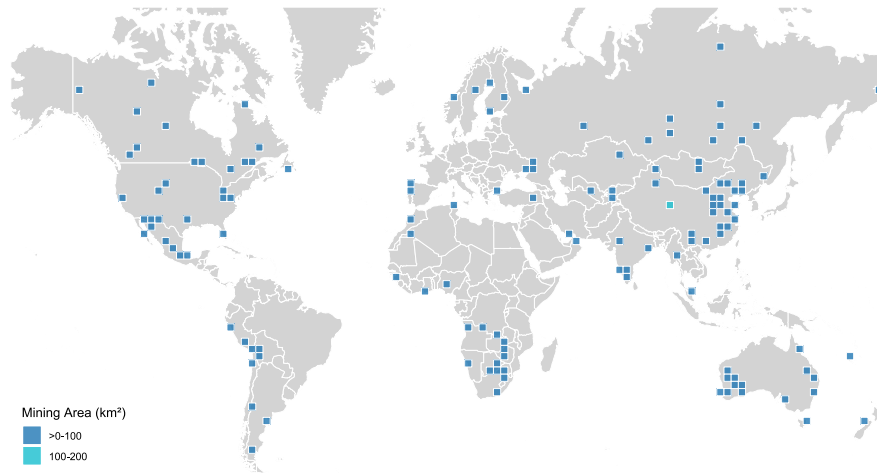

### Manganese

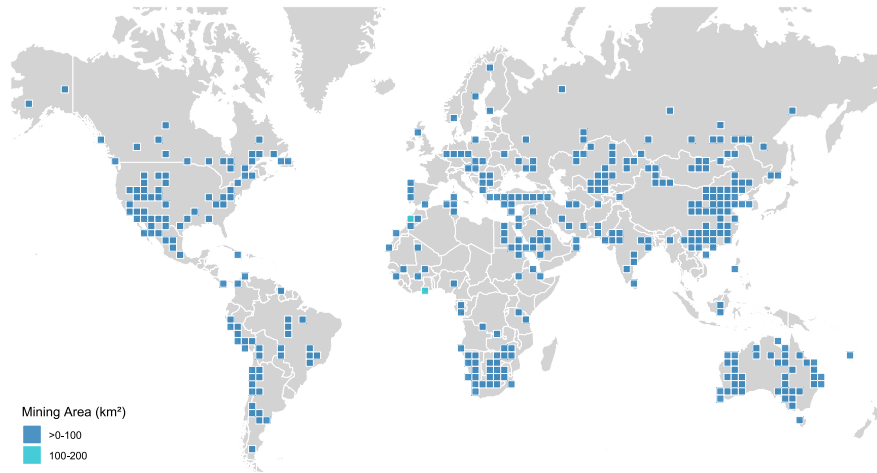

### Molybdenum

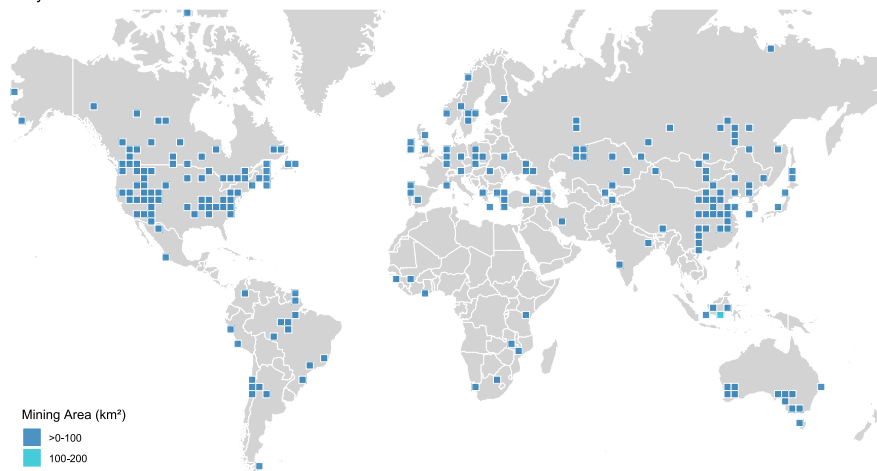

#### Nickel and Cobalt

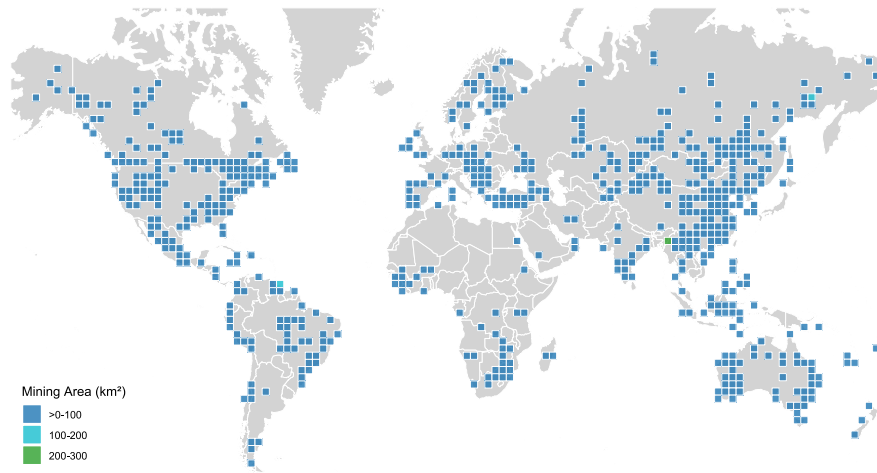

#### Tin

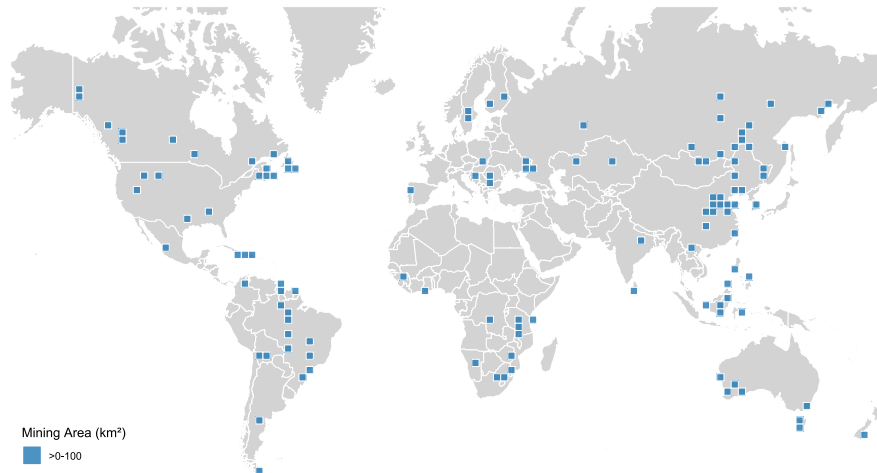

#### Tungsten

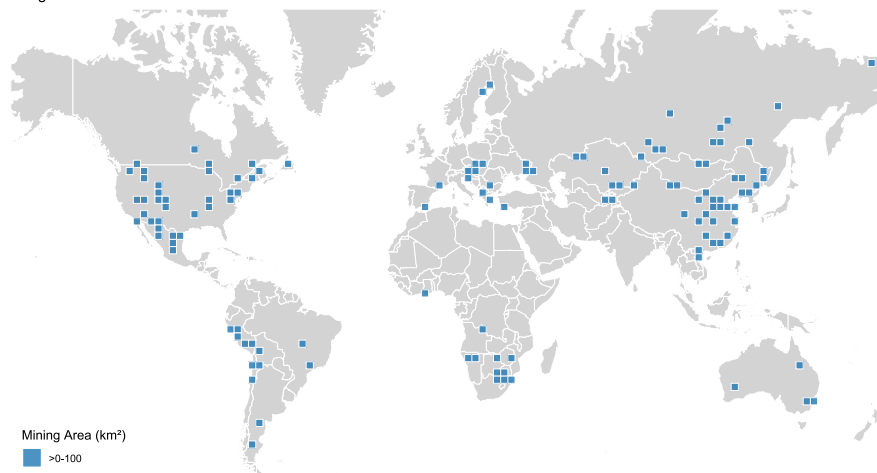

### Aluminium (Bauxite)

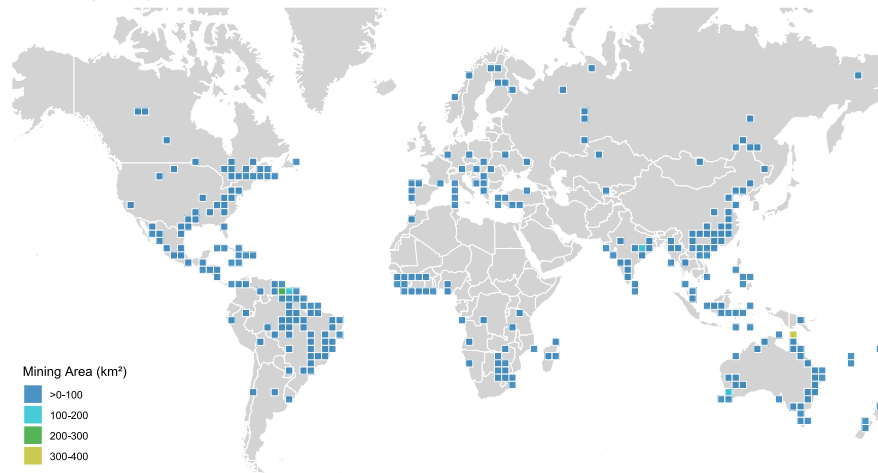

### Ilmenite

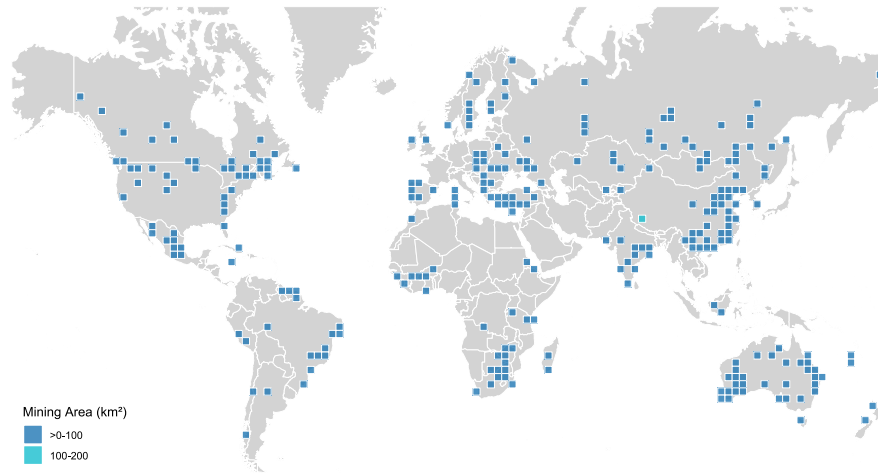

### Lithium

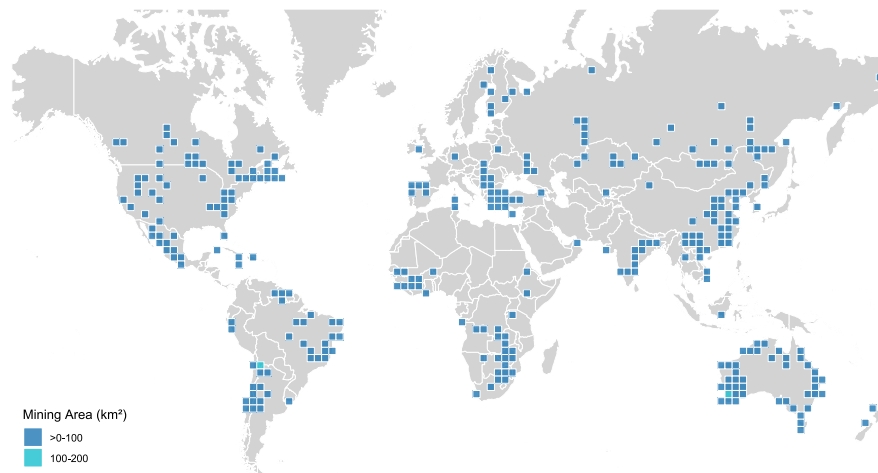

Mining Area (km<sup>2</sup>)

- >100
- 100-200

Coal

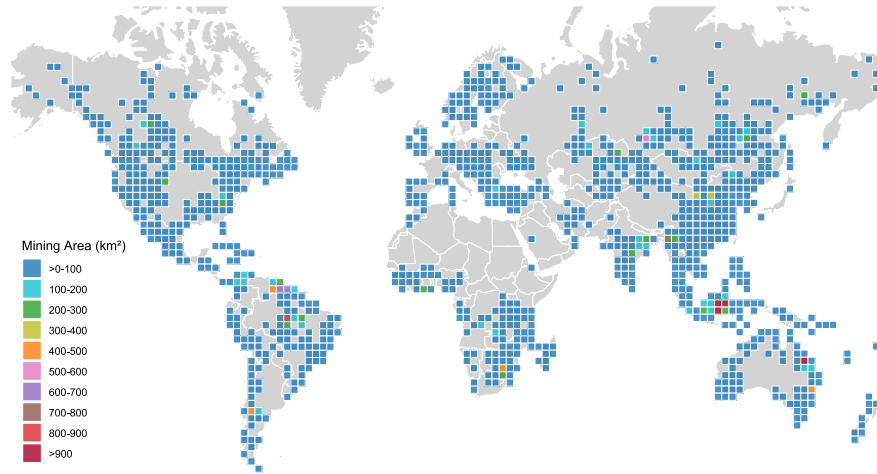

Other non-metals

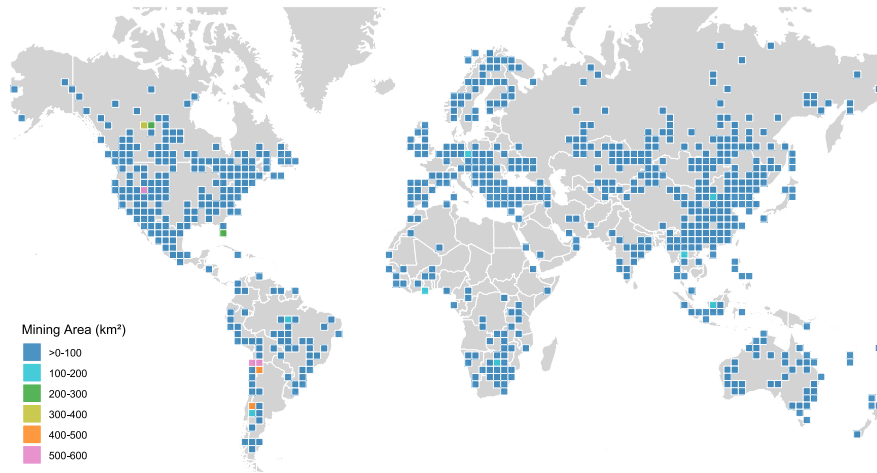

S3. Spatial Variation in Deforestation-to-Mining Area Ratio for 20 Commodities

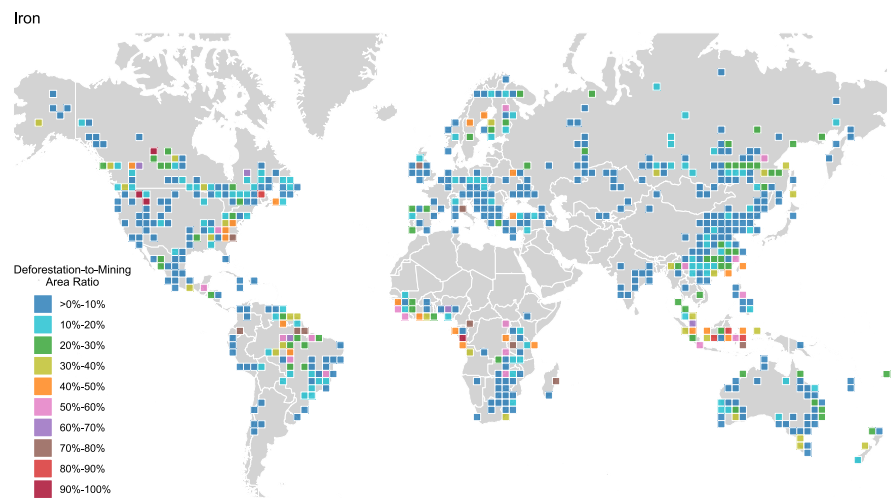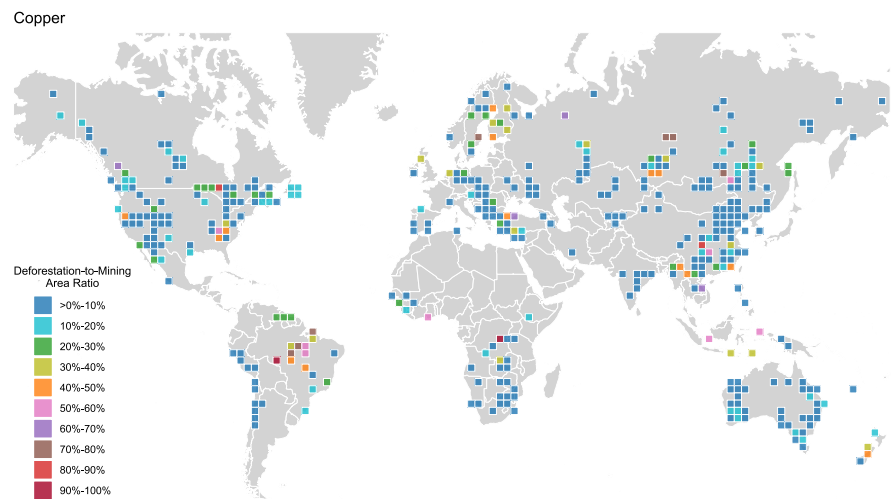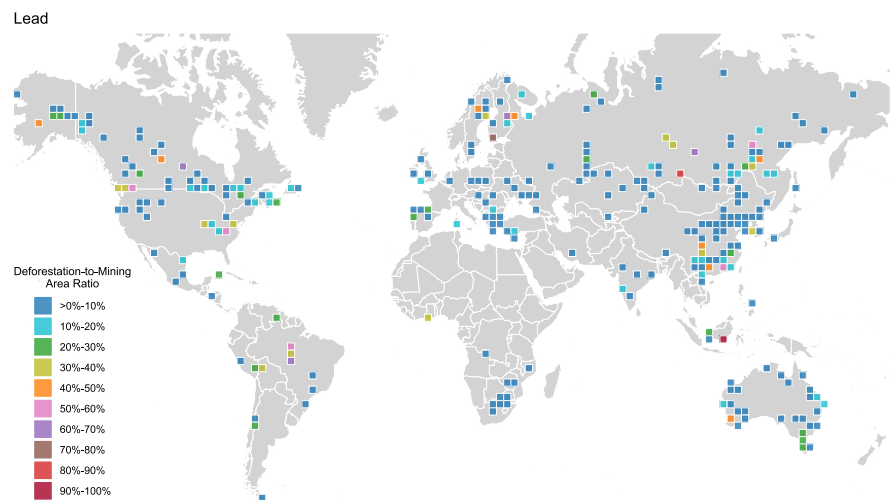



### Zinc

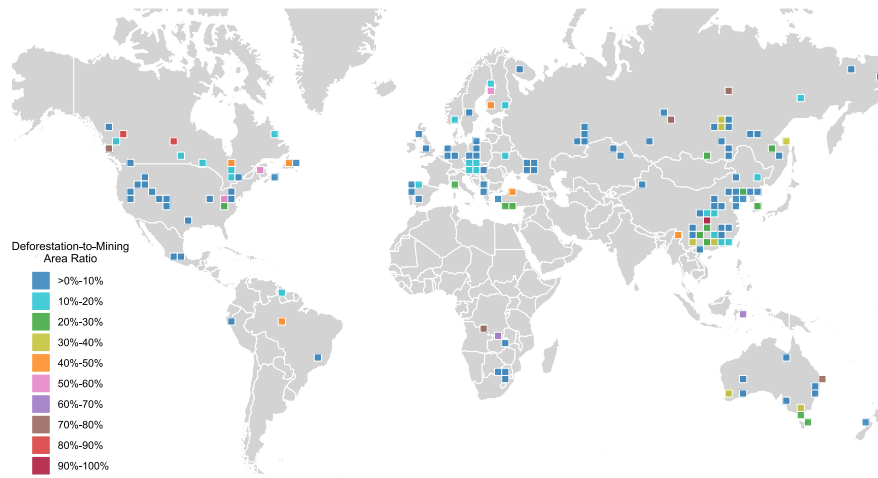

### Gold

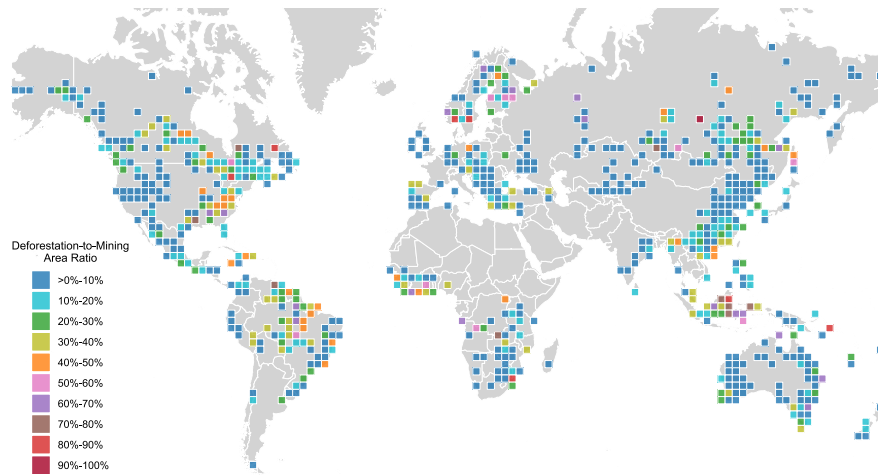

### Silver

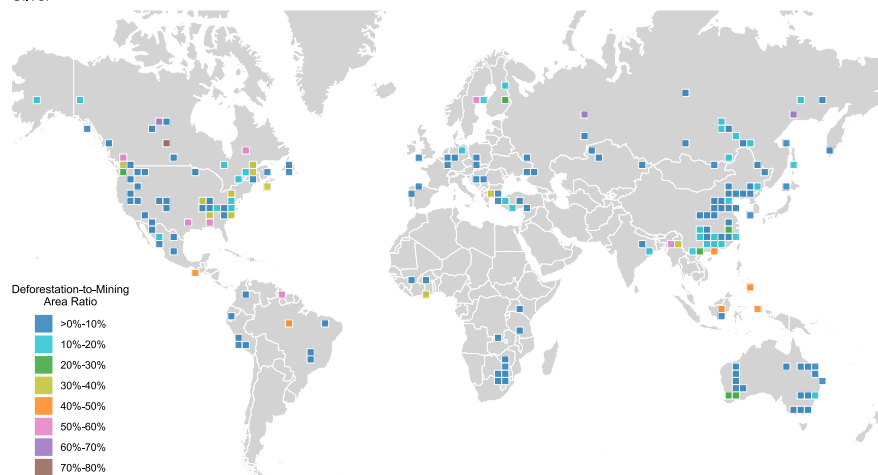

### Chromium

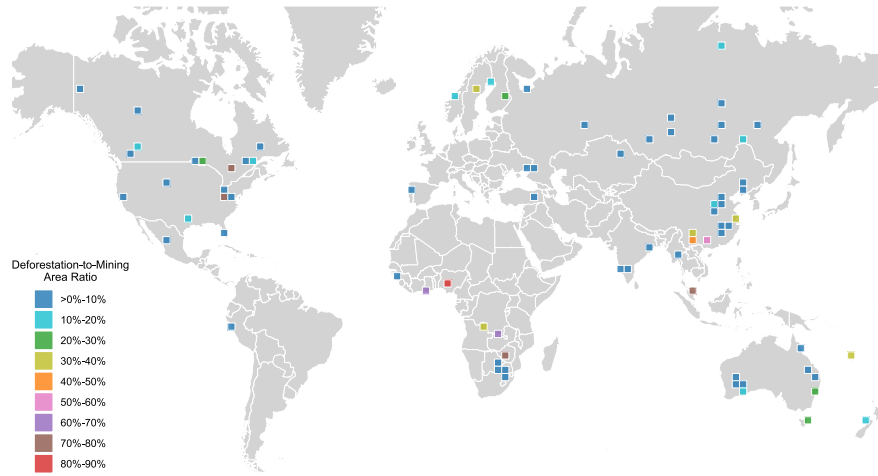

### Manganese

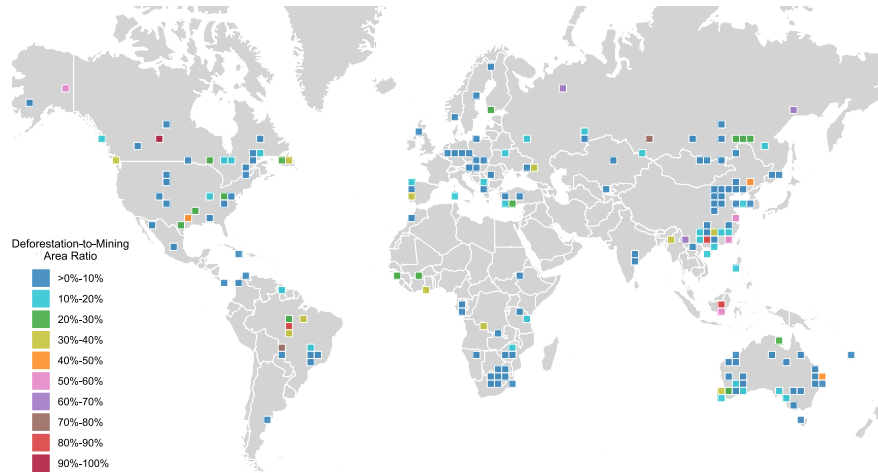

### Molybdenum

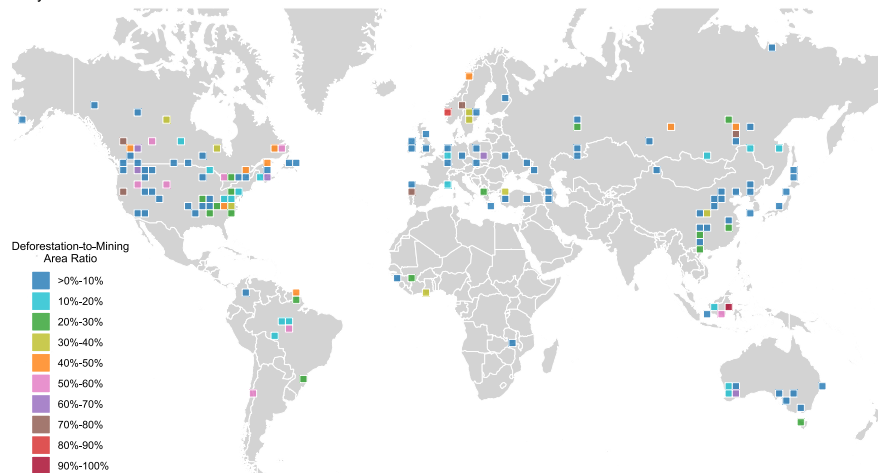

# Nickel and Cobalt

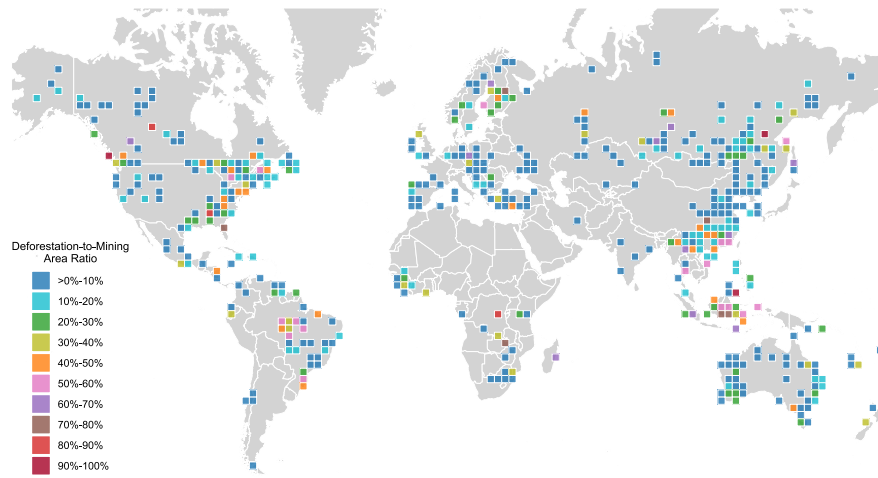

# Tin

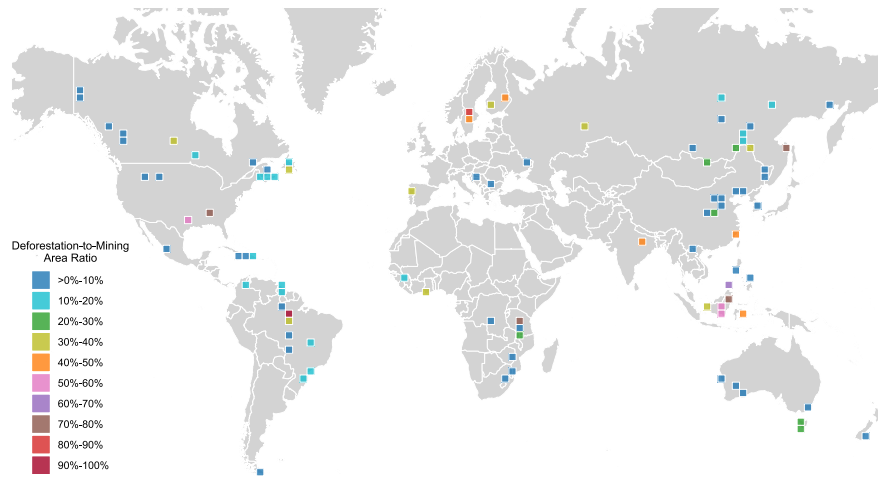

# Tungsten

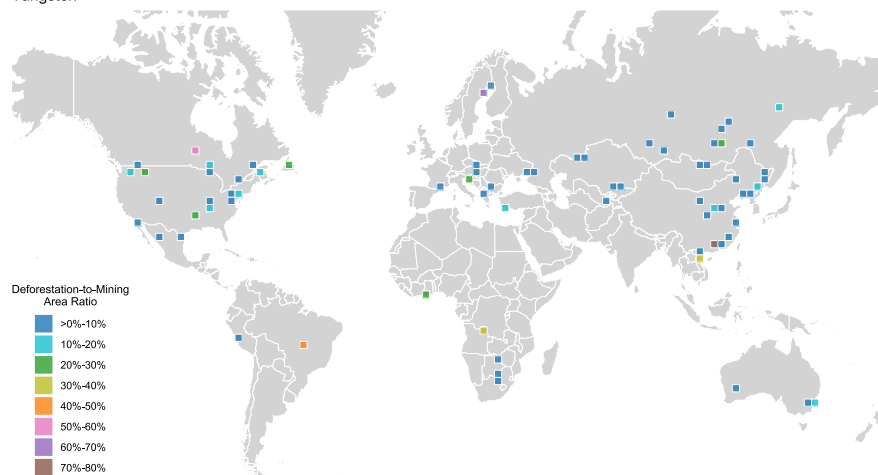

### Aluminium (Bauxite)

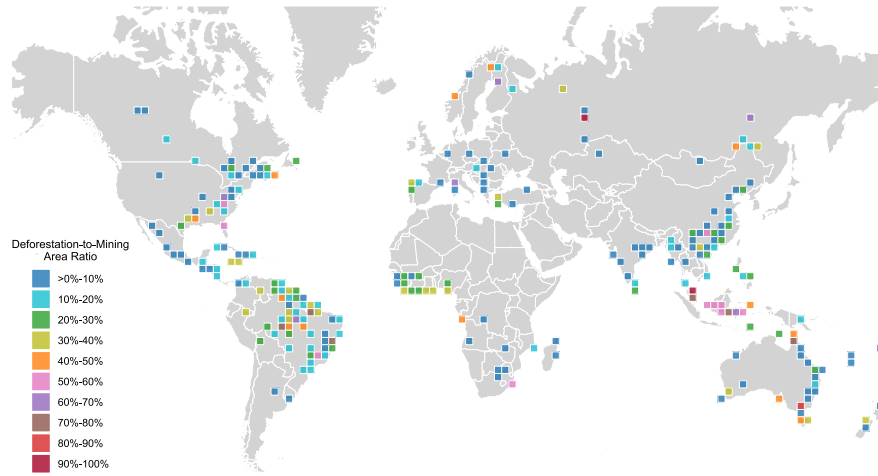

### Ilmenite

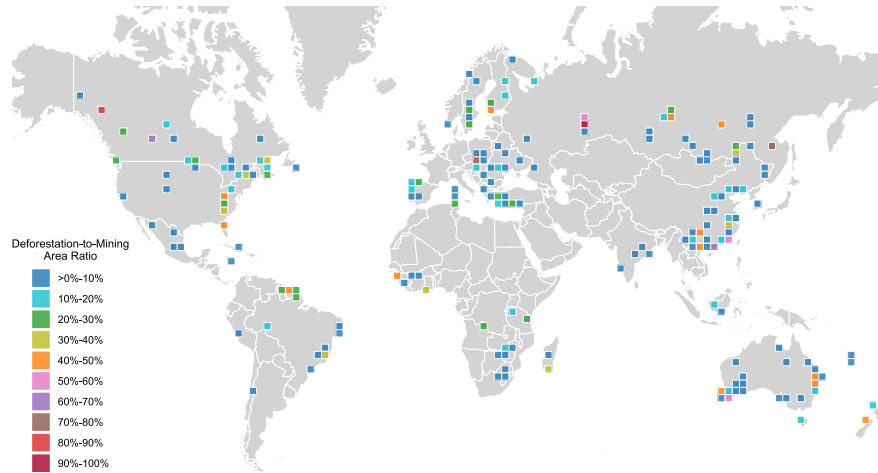

### Lithium

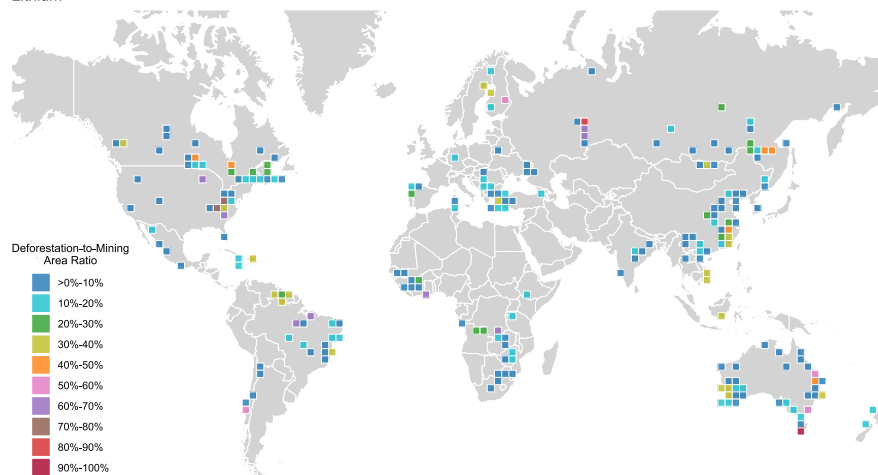

# PGE

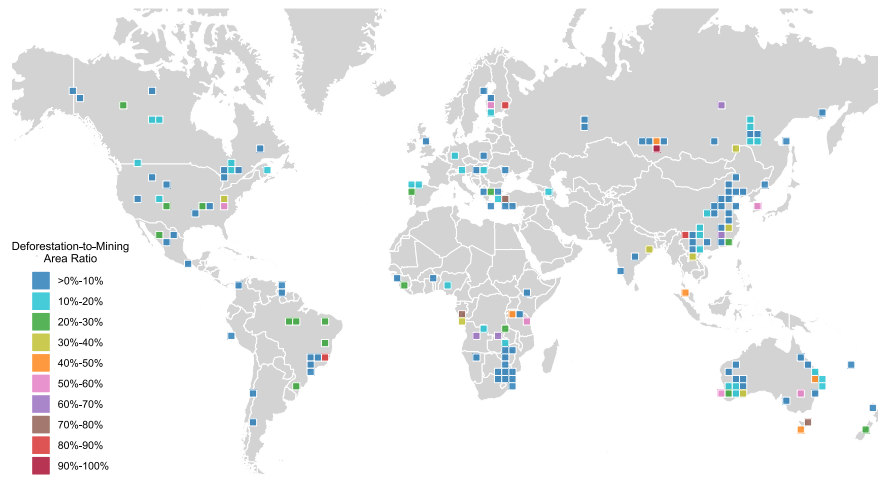

# Uranium

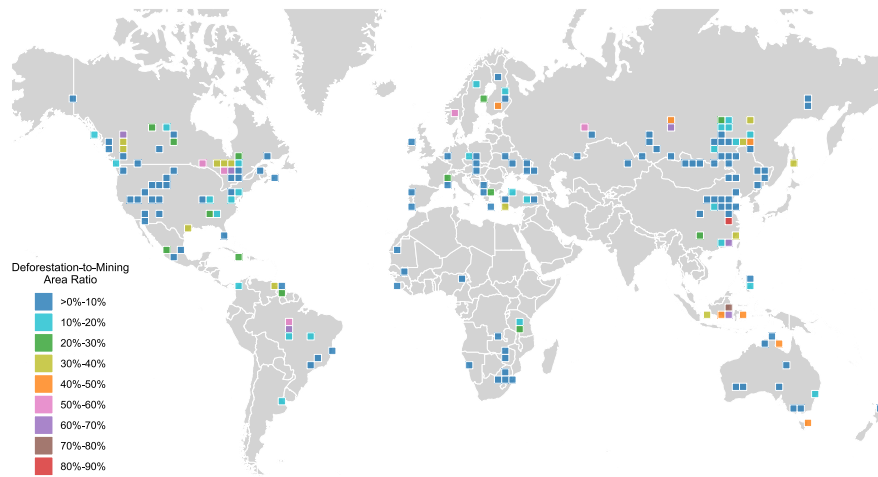

# Other metals

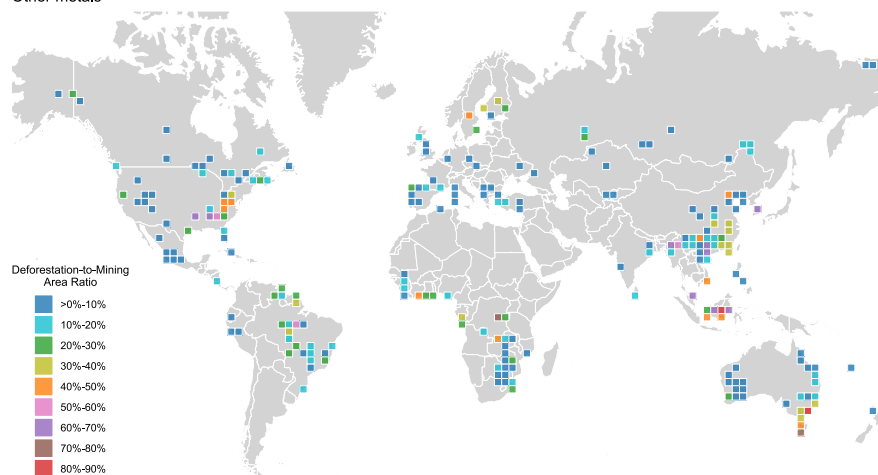

### Coal

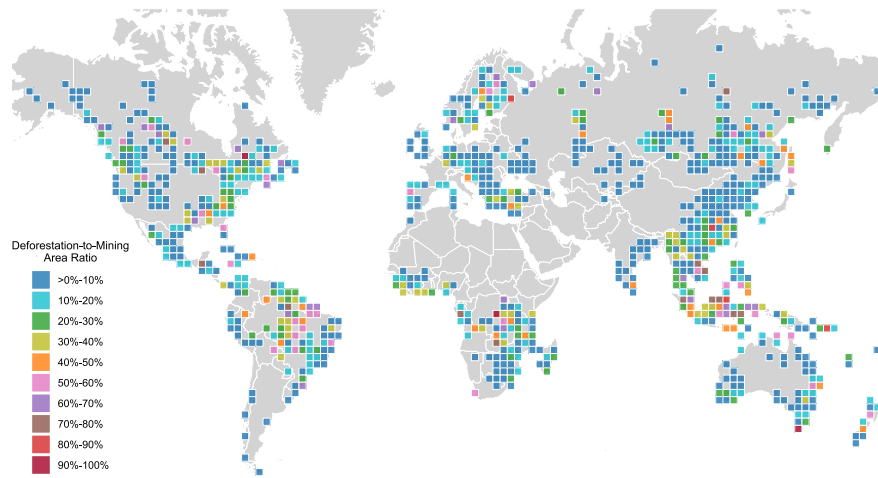

### Other non-metals

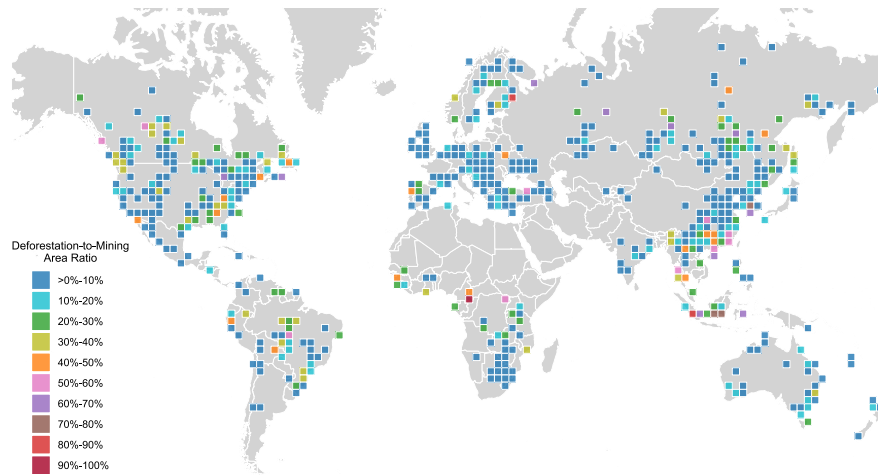

#### S4. Region-Commodity Combination

| Commodity           | Deforestation area of countries intersecting the Amazon and Southeast Asian rainforests (% of the total deforestation) | Deforestation area of other countries (% of the total deforestation) |
|---------------------|------------------------------------------------------------------------------------------------------------------------|----------------------------------------------------------------------|
| Iron                | 418.69 (2.86%)                                                                                                         | 627.32 (4.29%)                                                       |
| Gold                | 2123.16 (14.52%)                                                                                                       | 1060.49 (7.25%)                                                      |
| Nickel and Cobalt   | 271.79 (1.86%)                                                                                                         | 345.00 (2.36%)                                                       |
| Aluminium (Bauxite) | 432.76 (2.96%)                                                                                                         | 331.95 (2.27%)                                                       |
| Coal                | 4147.95 (28.37%)                                                                                                       | 1896.80 (12.97%)                                                     |
| Others              | 776.10 (5.31%)                                                                                                         | 2187.04 (14.96%)                                                     |
| ALL                 | 8170.45 (55.89%)                                                                                                       | 6448.60 (44.11%)                                                     |

S5. Spatial Variation in Extinction Risk Index (ERI) for 20 Commodities

Iron

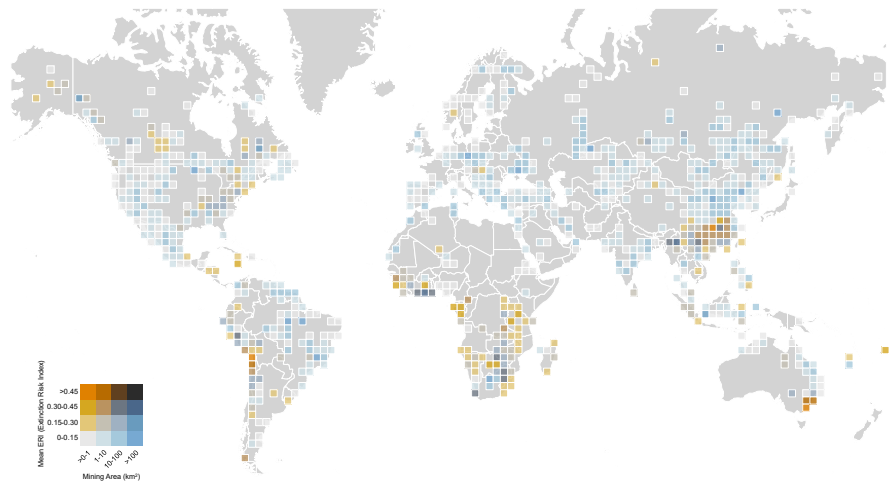

Copper

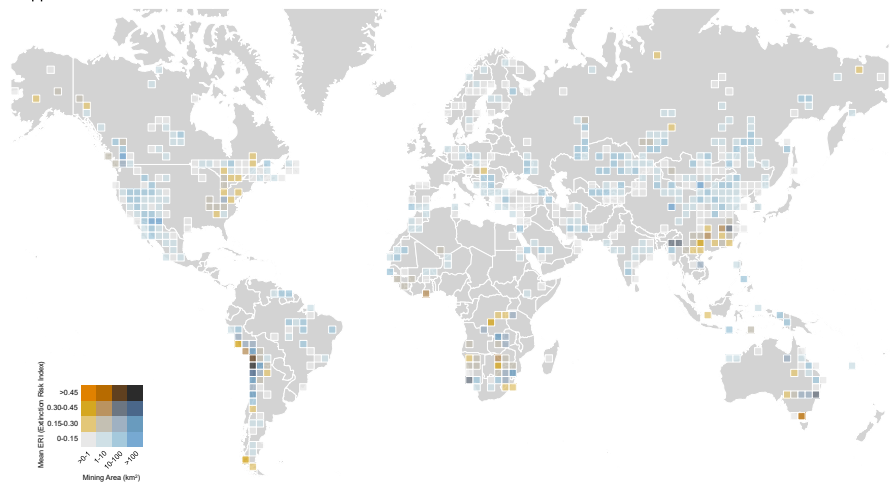

Lead

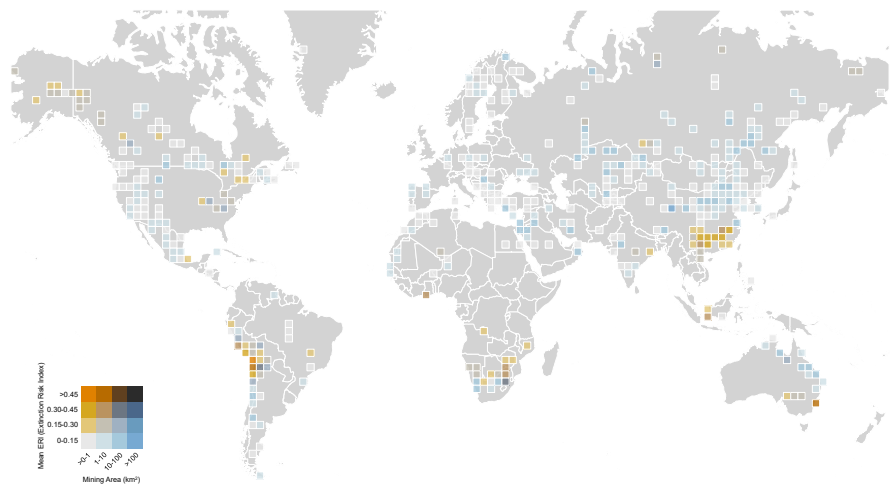



Zinc

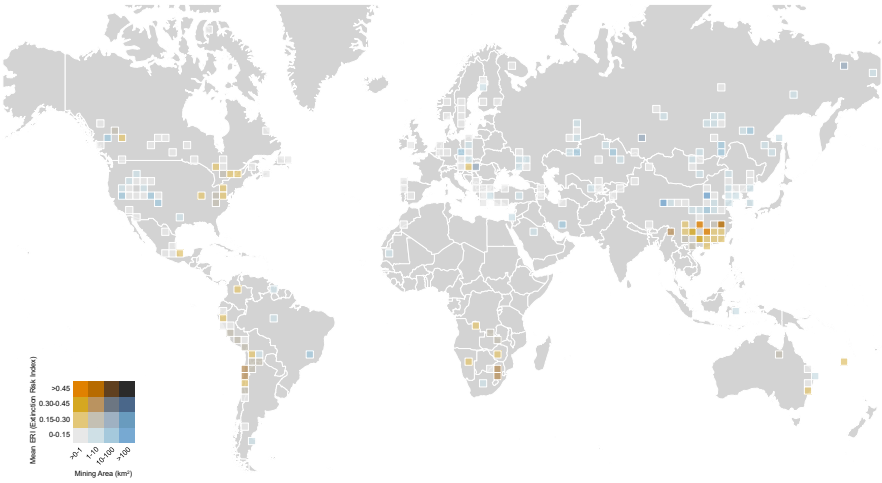

Gold

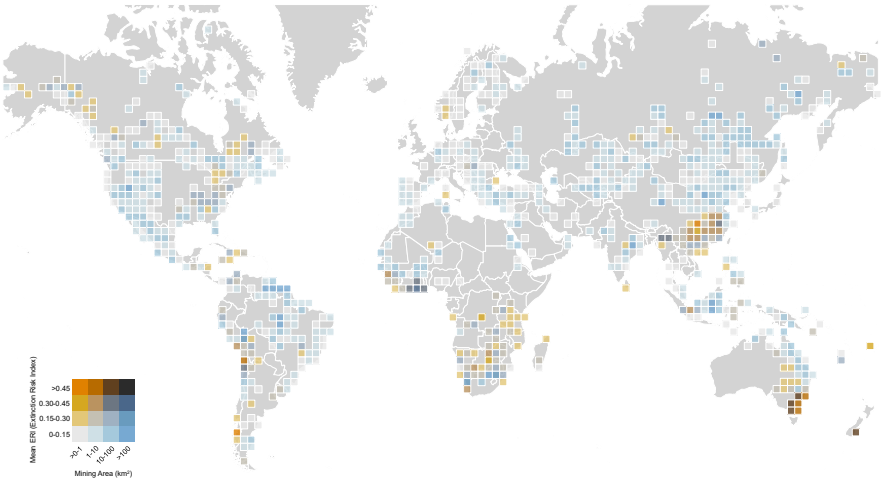

Silver

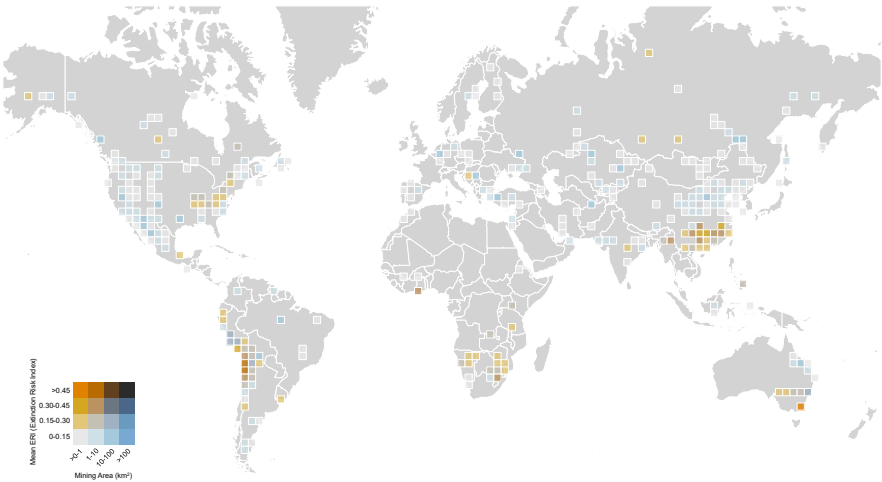

Chromium

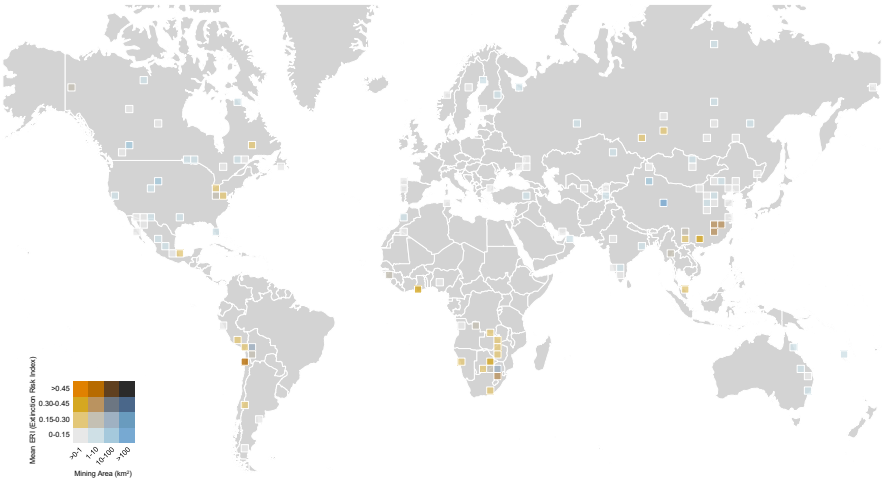

Manganese

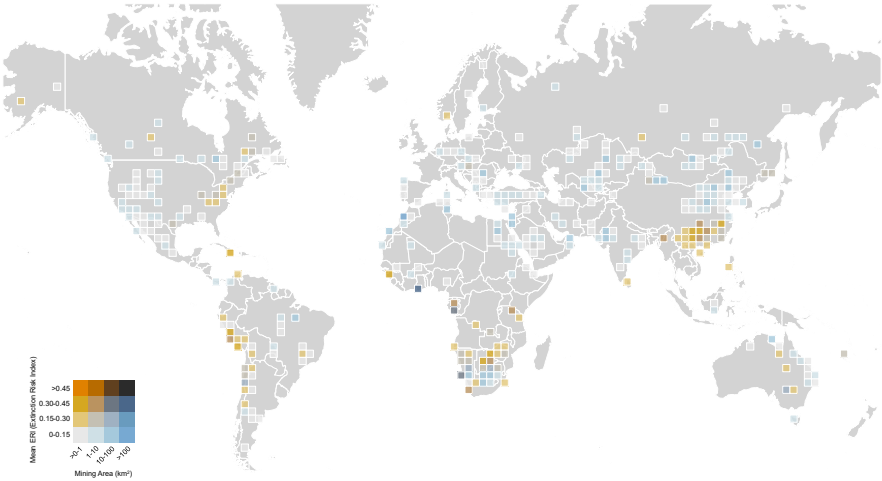

Molybdenum

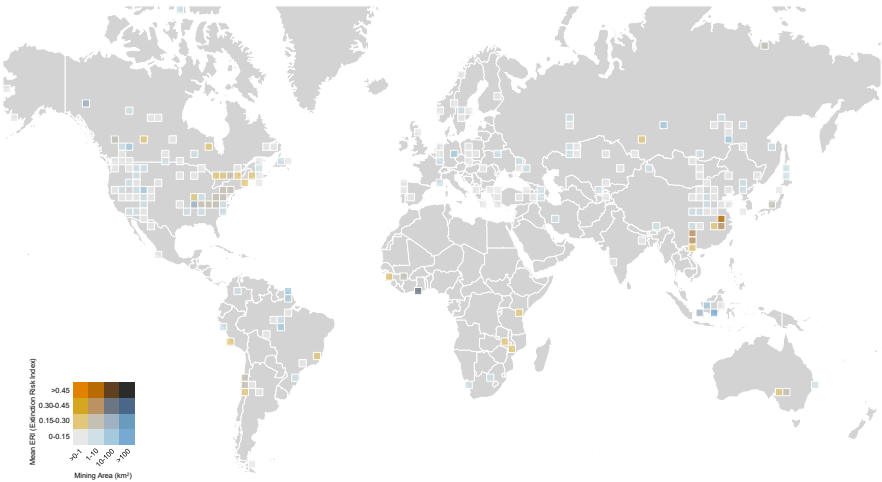

Nickel and Cobalt

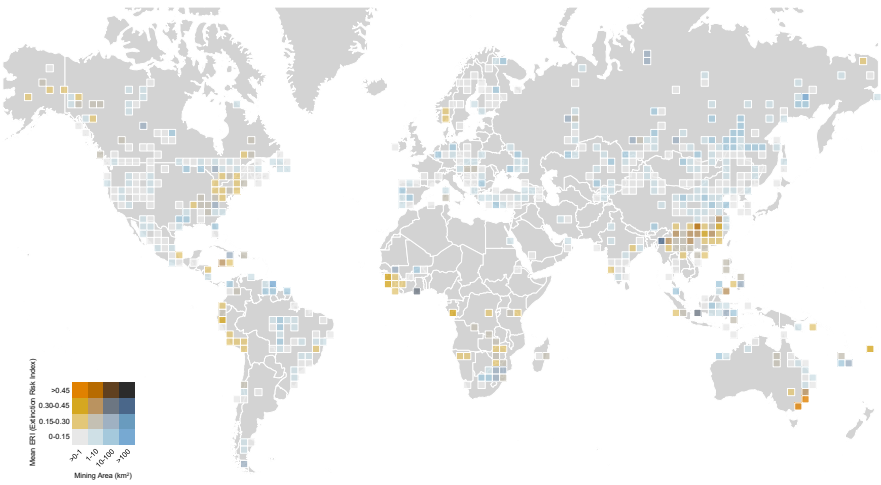

Tin

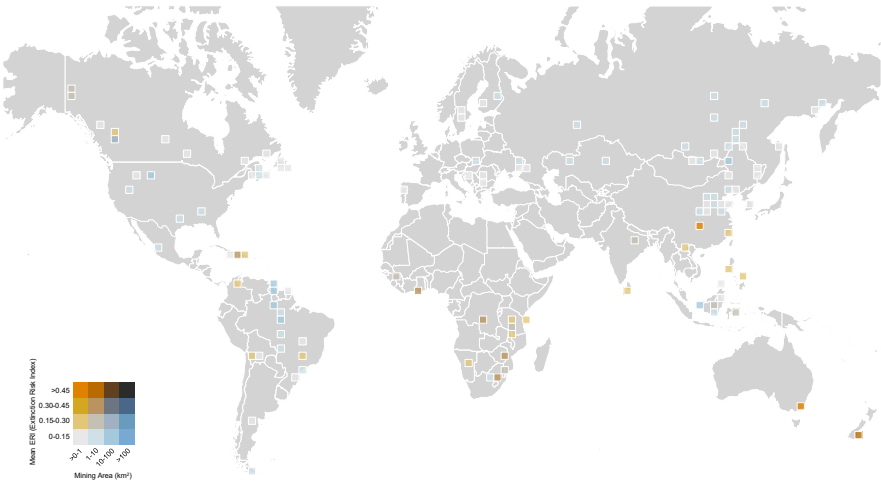

Tungsten

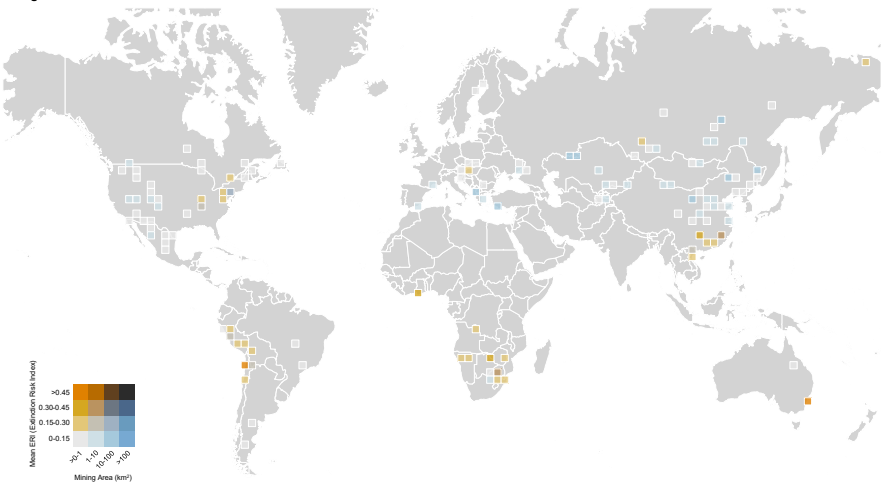

Aluminium (Bauxite)

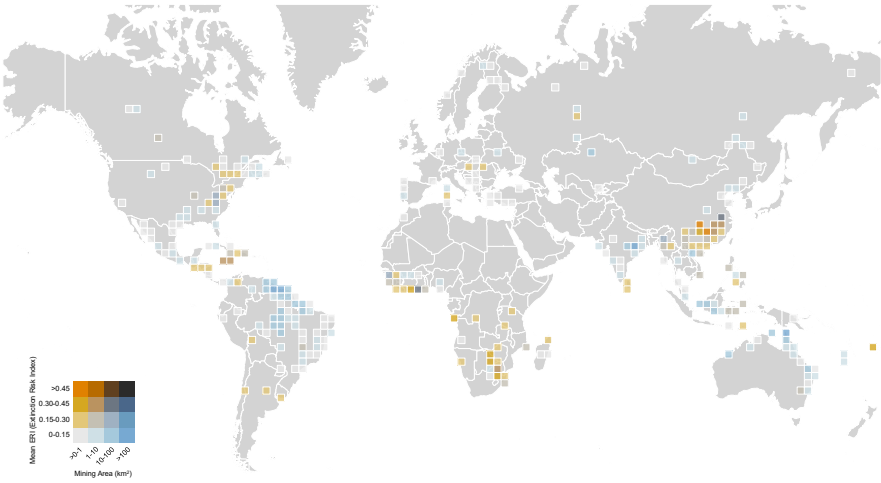

Ilmenite

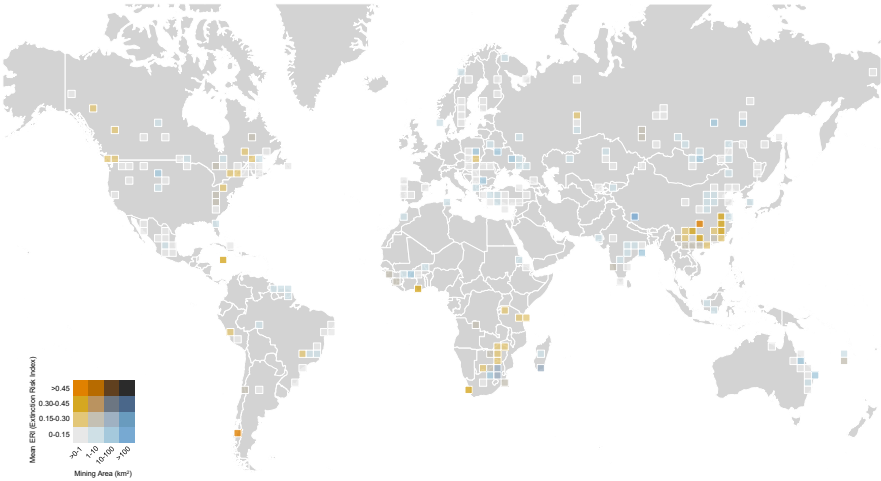

Lithium

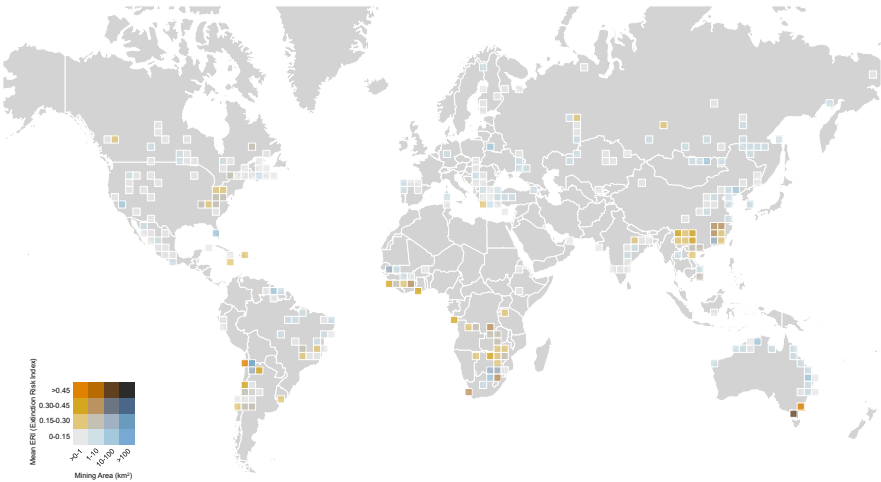

PGE

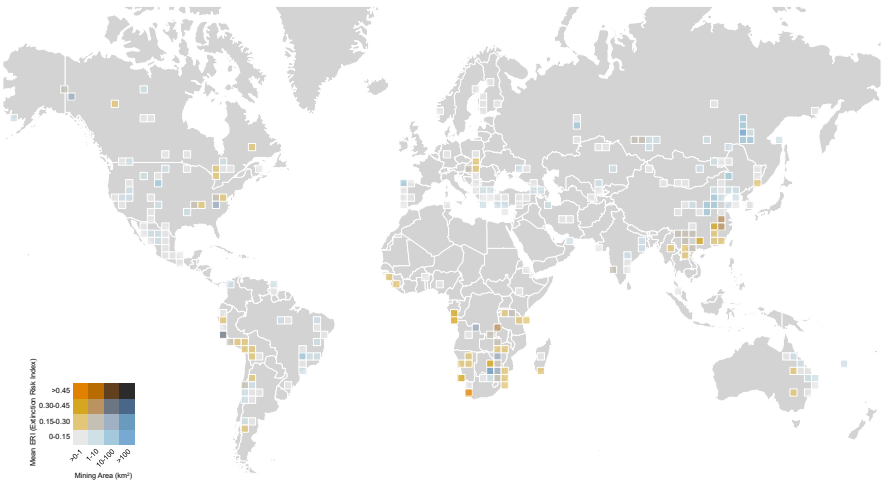

Uranium

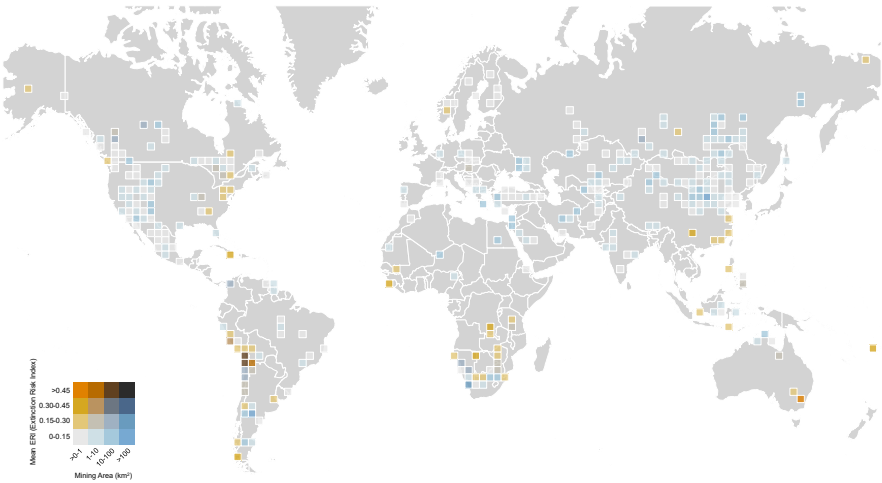

Other metals

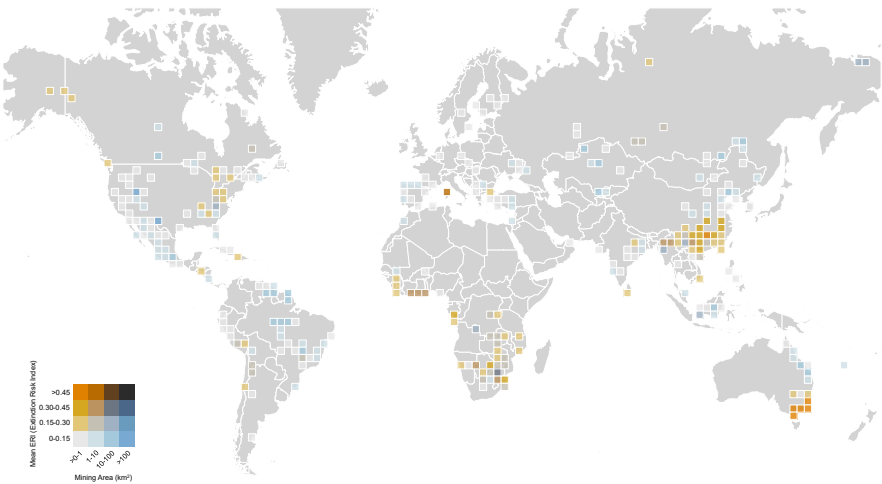

Coal

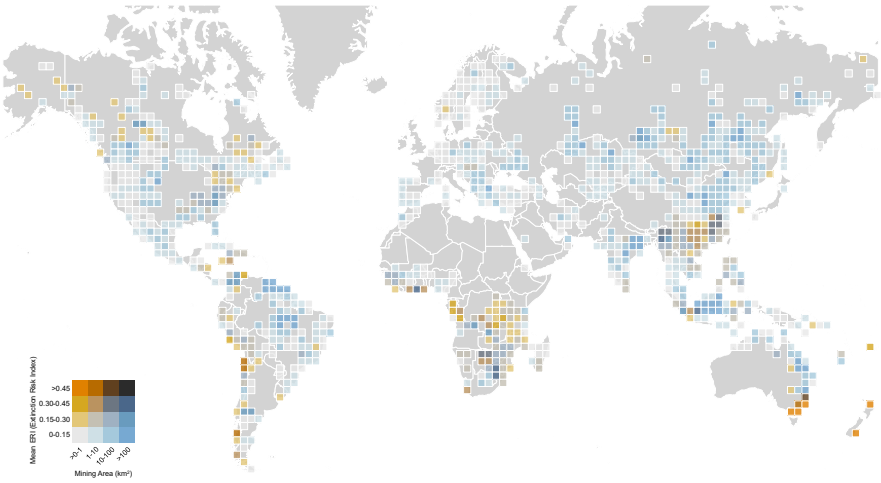

Other non-metals

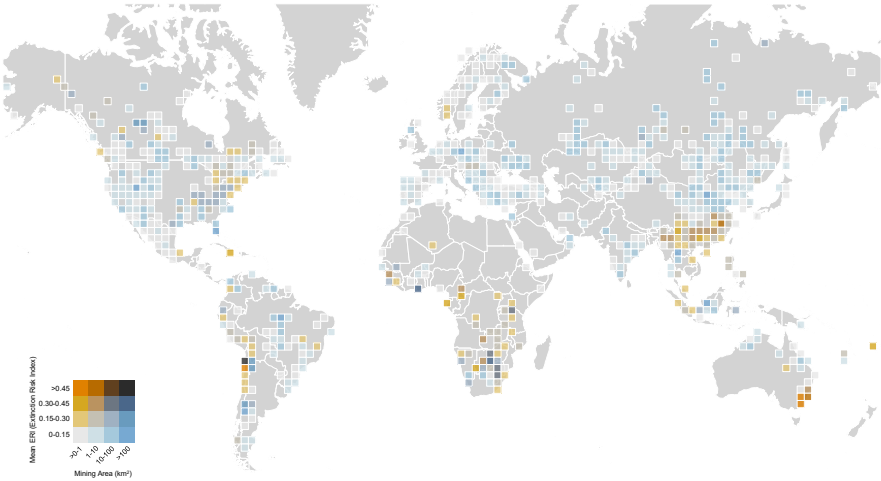

## S6. Data Sources and Preparation

This study's commodity classification builds on the delineation of mining areas from Maus *et al.*<sup>1,2</sup>. The dataset, consisting of 44,929 polygons covering 101,583 km<sup>2</sup>, represents a range of mining activities. However, as the Maus *et al.*<sup>2</sup> dataset lacks detailed commodity information, we supplemented it with point data from sources such as the SNL metals & mining dataset<sup>3</sup>, USGS<sup>4</sup>, Jasansky *et al.*<sup>5</sup>, and Franks *et al.*<sup>6</sup>, all of which provide spatial coordinates and commodity details. A spatial join was performed to integrate these point datasets with Maus *et al.*'s polygons<sup>2</sup>, linking point data to polygons where spatial overlap was detected. In cases where multiple points were associated with a single polygon, the most frequently represented commodity was assigned, and where no clear majority existed, a commodity was randomly selected. This process successfully labelled 1,941 polygons with commodity information into 20 commodity classes (see Table S6).

Table S6 shows that the 1,941 labelled polygons cover 30,890.83 km<sup>2</sup>, representing about 4% of the polygons in the Maus *et al.* dataset<sup>2</sup> but accounting for nearly 30% of the total land area. This suggests that larger industrial mines, which are more likely to be documented, are disproportionately represented, while smaller operations may be underreported. Gold is the most prevalent commodity by both polygon count and area, reflecting its economic importance and the availability of reliable data. However, some larger polygons may include non-mining areas, as noted by Tang and Werner<sup>7</sup>; for instance, one gold polygon spans 2,546 km<sup>2</sup>, nearly covering the entire upstream region of the Rio Madre De Dios River in Chile. Despite such limitations, the Maus *et al.* dataset<sup>2</sup> remains valuable for global commodity classification.

**Table S6 - Distribution of Mineral Categories after initial data integration**

| <b>Commodity</b>    | <b>Number of Polygons<br/>(% of Polygons)</b> | <b>Covered Areas<br/>(% of Covered Areas)</b> |
|---------------------|-----------------------------------------------|-----------------------------------------------|
| Iron                | 195 (10.046%)                                 | 3074.230 (9.95%)                              |
| Copper              | 264 (13.601%)                                 | 4564.758 (14.78%)                             |
| Lead                | 26 (1.340%)                                   | 155.419 (0.50%)                               |
| Zinc                | 93 (4.791%)                                   | 314.733 (1.02%)                               |
| Gold                | 528 (27.202%)                                 | 8429.676 (27.29%)                             |
| Silver              | 57 (2.937%)                                   | 169.185 (0.55%)                               |
| Chromium            | 12 (0.618%)                                   | 51.436 (0.17%)                                |
| Manganese           | 13 (0.670%)                                   | 142.978 (0.46%)                               |
| Molybdenum          | 13 (0.670%)                                   | 137.116 (0.44%)                               |
| Nickel and Cobalt   | 64 (3.297%)                                   | 560.869 (1.82%)                               |
| Tin                 | 4 (0.206%)                                    | 87.531 (0.28%)                                |
| Tungsten            | 5 (0.258%)                                    | 4.470 (0.01%)                                 |
| Aluminium (Bauxite) | 42 (2.164%)                                   | 928.334 (3.01%)                               |
| Ilmenite            | 7 (0.361%)                                    | 70.116 (0.23%)                                |
| Lithium             | 7 (0.361%)                                    | 65.408 (0.21%)                                |
| PGE                 | 34 (1.752%)                                   | 169.852 (0.55%)                               |
| Uranium             | 26 (1.340%)                                   | 227.621 (0.74%)                               |
| Other metals        | 15 (0.773%)                                   | 326.109 (1.06%)                               |
| Coal                | 386 (19.887%)                                 | 7224.282 (23.39%)                             |
| Other non-metals    | 150 (7.728%)                                  | 4186.712 (13.55%)                             |
| <b>Total</b>        | <b>1941 (100%)</b>                            | <b>30890.834 (100%)</b>                       |



## S7. Open-pit Identification

Before classifying commodities for polygons without labels, a machine-learning model was developed using a random forest algorithm to detect open pits within each mining area polygon. Random forests are widely regarded for classification tasks, particularly for their robustness in handling high-dimensional datasets and their resistance to overfitting<sup>8</sup>. 558 ASTER scenes were used and filtered to remove areas containing snow, clouds, and water bodies according to criteria established by Hall *et al.*<sup>9</sup>, Werner *et al.*<sup>10</sup>, and the JRC Monthly Water History dataset<sup>11</sup>. Vegetative interference was minimised by selecting scenes with the lowest band values, ensuring more reliable spectral analysis and reducing environmental noise.

The model was trained using an 80:20 cross-validation approach, splitting the scenes into training and validation subsets. Table S7.1 details the distribution of land-use types across these subsets. "Open Pit" and "Vegetation" classes have the most samples, reflecting their prevalence in real-world mining regions. In contrast, the "Dam" and "Waste Rock Dump (WRD)" classes contain fewer samples, consistent with their less frequent occurrence. This distribution reflects the true environmental heterogeneity in mining areas, ensuring the model is trained to represent realistic conditions, thus improving the generalisability of its predictions.

The model's performance is summarised in Table S7.2, which presents the confusion matrix for open-pit identification along with accuracy metrics. The model achieved an overall accuracy of 87.76%, with open pits correctly classified in 25 of 27 instances (92.6% accuracy). In addition, the model successfully identified dams, WRD, and facilities in 23 of 30 instances (76.7% accuracy). These results validate the model's utility in identifying critical mining infrastructure across diverse land-use types.

**Table S7.1 – Distribution of Training and Validation Subsets for Open-pit Identification**

| Land Use        | Training Subset | Validation Subset |
|-----------------|-----------------|-------------------|
| Open Pit        | 97              | 27                |
| Dam             | 35              | 7                 |
| Waste Rock Dump | 63              | 9                 |
| Facility        | 81              | 14                |
| Vegetation      | 100             | 23                |
| Bare Soil       | 84              | 18                |

**Table S7.2 – Confusion Matrix for Open-Pit Identification**

| Land Use            | Open Pit | Dam    | Waste Rock Dump | Facility | Vegetation | Bare Soil | User's accuracy    |
|---------------------|----------|--------|-----------------|----------|------------|-----------|--------------------|
| Open Pit            | 25       | 1      | 0               | 0        | 1          | 0         | 92.59%             |
| Dam                 | 1        | 5      | 0               | 0        | 1          | 0         | 71.43%             |
| Waste Rock Dump     | 0        | 1      | 6               | 0        | 1          | 1         | 66.67%             |
| Facility            | 0        | 0      | 2               | 12       | 0          | 0         | 85.71%             |
| Vegetation          | 1        | 0      | 0               | 1        | 20         | 1         | 86.96%             |
| Bare Soil           | 0        | 0      | 0               | 0        | 0          | 18        | 100.00%            |
| Producer's accuracy | 92.59%   | 71.43% | 75.00%          | 92.31%   | 86.96%     | 90.00%    | Overall:<br>87.76% |

## S8. Commodity Classification

Following identifying open-pit points for each polygon, a commodity classification model was applied to assign the appropriate commodities to each point corresponding to its respective polygon. The model was based on 26 band ratio indices derived from the ASTER Mineral Index Processing Manual<sup>12</sup>, as outlined in Table S8.1. The distribution of training and validation subsets used for the classification process is detailed in Table S8.2. Confusion matrices summarising the performance of the commodity classification are shown in Table S8.3, while the overall confusion matrix and user's and producer's accuracies are presented in Tables S8.4 and S8.5. The final classification outcomes are provided in Table S8.6.

Among the 20 commodities, iron, copper, lead, zinc, nickel-cobalt, and coal were validated using external mine site datasets, including iron from the Global Iron Ore Mines Tracker<sup>13</sup>, coal from the Global Coal Mine Tracker<sup>14</sup>, and copper, lead-zinc, and nickel datasets from Northey *et al.*<sup>15</sup>, which provide coordinate points but lack mining boundary and area information. All external datasets encompass mines with various statuses, such as operating, mothballed, proposed, or retired. In addition, the two Tracker datasets<sup>13,14</sup> provide location accuracies classified as exact or proximate, while the Global Coal Mine Tracker<sup>14</sup> uniquely includes information on mine type, distinguishing between surface and underground mines.

In this context, only operating mines were included. Specifically, for iron and coal, only mines with exact location accuracy were used, and only surface coal mines were considered. The validation accuracies for these commodities, presented in Table S8.7, are based on the number of points that intersect with the polygons (Table S8.6) and the areas of these intersecting polygons. Notably, each polygon in this study is assigned a primary commodity. As a result, cases such as an iron mine point intersecting with a copper polygon identified from other sources<sup>3,4,5,6,13,14,15</sup> can occur (e.g. Iron Oxide Copper-Gold deposits). These instances are not deemed incorrect but are recognised as valid due to the multi-commodity nature of mining areas. Given the limited availability of external datasets, the validation results are considered reasonable and reflect the inherent complexity of mining operations.

**Table S8.1 – Band Ratio Indices (Geoscience Australia, 2004)**

| No. | Indices                                                  | Ratio                |
|-----|----------------------------------------------------------|----------------------|
| 1   | Ferric iron, Fe <sup>3+</sup>                            | 2/1                  |
| 2   | Ferrous iron, Fe <sup>2+</sup>                           | 5/3+1/2              |
| 3   | Laterite/Silica Alteration                               | 4/5                  |
| 4   | Gossan                                                   | 4/2                  |
| 5   | Ferrous silicates (biot, chi, amph)                      | 5/4                  |
| 6   | Ferric oxides                                            | 4/3                  |
| 7   | Carbonate/chlorite/epidote                               | (7+9)/8              |
| 8   | Epidote/chlorite/amphibole                               | (6+9)/(7+8)          |
| 9   | Amphibole/MgOH                                           | (6+9)/8              |
| 10  | Amphibole                                                | 6/8                  |
| 11  | Dolomite                                                 | (6+8)/7              |
| 12  | Carbonate                                                | 13/14                |
| 13  | Sericite/muscovite/illite/smectite                       | (5+7)/6              |
| 14  | Alunite/kaolinite/pyrophyllite                           | (4+6)/5              |
| 15  | Phengitic/Host rock                                      | 5/6                  |
| 16  | Muscovite                                                | 7/6                  |
| 17  | Kaolinite                                                | 7/5                  |
| 18  | Clay                                                     | (5x7)/6 <sup>2</sup> |
| 19  | Quartz rich rocks                                        | 14/12                |
| 20  | Silica (1)                                               | (11x11)/10/12        |
| 21  | Basic degree index (gnt, cpx, epi, chl)/SiO <sub>2</sub> | 12/13                |
| 22  | SiO <sub>2</sub>                                         | 13/12                |
| 23  | Siliceous rocks                                          | (11x11)/(10x12)      |
| 24  | Silica (2)                                               | 11/10                |
| 25  | Silica (3)                                               | 11/12                |
| 26  | Silica (4)                                               | 13/10                |

**Table S8.2a – Distribution of Training and Validation Subsets for Commodity Classification (Level 1)**

| Commodity       | Training Subset | Validation Subset |
|-----------------|-----------------|-------------------|
| Non-metals      | 1248            | 312               |
| Non-iron metals | 1297            | 325               |
| Iron            | 1297            | 325               |

**Table S8.2b – Distribution of Training and Validation Subsets for Commodity Classification (Level 2-1)**

| Commodity        | Training Subset | Validation Subset |
|------------------|-----------------|-------------------|
| Other non-metals | 416             | 104               |
| Coal             | 416             | 104               |

**Table S8.2c – Distribution of Training and Validation Subsets for Commodity Classification (Level 2-2)**

| Commodity                  | Training Subset | Validation Subset |
|----------------------------|-----------------|-------------------|
| Chalcophile-related metals | 416             | 104               |
| Aluminium (Bauxite)        | 416             | 104               |
| Chromium                   | 416             | 104               |
| Nickel and Cobalt          | 416             | 104               |
| Lithium                    | 416             | 104               |
| Manganese                  | 416             | 104               |
| Other metals               | 416             | 104               |
| PGE                        | 416             | 104               |
| Tin                        | 416             | 104               |
| Ilmenite                   | 416             | 104               |
| Tungsten                   | 416             | 104               |
| Uranium                    | 416             | 104               |

**Table S8.2d – Distribution of Training and Validation Subsets for Commodity Classification (Level 3-1)**

| Commodity  | Training Subset | Validation Subset |
|------------|-----------------|-------------------|
| Copper     | 416             | 104               |
| Gold       | 416             | 104               |
| Lead       | 416             | 104               |
| Molybdenum | 416             | 104               |
| Silver     | 416             | 104               |
| Zinc       | 416             | 104               |

**Table S8.3a – Confusion Matrix for Commodity Classification (Level 1)**

|                 | Non-metals | Non-iron metals | Iron |
|-----------------|------------|-----------------|------|
| Non-metals      | 253        | 59              | 10   |
| Non-iron metals | 40         | 230             | 2    |
| Iron            | 19         | 36              | 313  |

**Table S8.3b – Confusion Matrix for Commodity Classification (Level 2-1)**

|                  | Other non-metals | Coal |
|------------------|------------------|------|
| Other non-metals | 89               | 25   |
| Coal             | 15               | 79   |

**Table S8.3c – Confusion Matrix for Commodity Classification (Level 2-2)**

|                                | Chalco-<br>phile-<br>related<br>metals | Alu-<br>minium<br>(Bauxite) | Chro-<br>mium | Cobalt<br>and<br>Nickel | Lith-<br>ium | Manga-<br>nese | Other<br>metals | PGE | Tin | Il-<br>menite | Tung-<br>sten | Ura-<br>nium |
|--------------------------------|----------------------------------------|-----------------------------|---------------|-------------------------|--------------|----------------|-----------------|-----|-----|---------------|---------------|--------------|
| Chalcophile-<br>related metals | 67                                     | 1                           | 1             | 1                       | 0            | 0              | 0               | 1   | 0   | 0             | 0             | 0            |
| Aluminium<br>(Bauxite)         | 5                                      | 103                         | 0             | 0                       | 0            | 0              | 0               | 0   | 0   | 0             | 0             | 0            |
| Chromium                       | 1                                      | 0                           | 101           | 0                       | 0            | 1              | 2               | 0   | 0   | 0             | 0             | 0            |
| Nickel and<br>Cobalt           | 9                                      | 0                           | 0             | 98                      | 0            | 9              | 0               | 1   | 0   | 0             | 0             | 0            |
| Lithium                        | 1                                      | 0                           | 0             | 0                       | 104          | 1              | 0               | 0   | 0   | 0             | 0             | 0            |
| Manganese                      | 3                                      | 0                           | 0             | 1                       | 0            | 100            | 0               | 1   | 1   | 0             | 0             | 0            |
| Other metals                   | 6                                      | 0                           | 0             | 1                       | 0            | 6              | 102             | 0   | 0   | 0             | 0             | 0            |
| PGE                            | 2                                      | 0                           | 2             | 1                       | 0            | 2              | 0               | 101 | 0   | 0             | 0             | 1            |
| Tin                            | 2                                      | 0                           | 1             | 0                       | 0            | 0              | 0               | 0   | 103 | 0             | 0             | 0            |
| Ilmenite                       | 2                                      | 0                           | 0             | 1                       | 0            | 2              | 0               | 0   | 0   | 104           | 0             | 0            |
| Tungsten                       | 2                                      | 0                           | 0             | 1                       | 0            | 0              | 0               | 0   | 0   | 0             | 104           | 1            |
| Uranium                        | 6                                      | 0                           | 0             | 0                       | 0            | 0              | 0               | 0   | 0   | 0             | 0             | 101          |

**Table S8.3d – Confusion Matrix for Commodity Classification (Level 3-1)**

|            | Copper | Gold | Lead | Molybdenum | Silver | Zinc |
|------------|--------|------|------|------------|--------|------|
| Copper     | 69     | 21   | 1    | 0          | 0      | 3    |
| Gold       | 19     | 69   | 9    | 1          | 0      | 0    |
| Lead       | 8      | 5    | 84   | 0          | 4      | 2    |
| Molybdenum | 1      | 3    | 0    | 102        | 1      | 0    |
| Silver     | 3      | 5    | 8    | 0          | 98     | 0    |
| Zinc       | 4      | 1    | 2    | 1          | 1      | 99   |

**Table S8.4 Overall Confusion Matrix**

|                            | Non-metals | Non-iron Metals | Iron | Other non-metals | Coal | Chalcophile-related metals | Aluminium (Bauxite) | Chromium | Nickel and Cobalt | Lithium | Manganese | Other metals | PGE | Tin | Ilmenite | Tungsten | Uranium | Copper | Gold | Lead | Molybdenum | Silver | Zinc |
|----------------------------|------------|-----------------|------|------------------|------|----------------------------|---------------------|----------|-------------------|---------|-----------|--------------|-----|-----|----------|----------|---------|--------|------|------|------------|--------|------|
| Non-metals                 | 253        | 59              | 10   | 0                | 0    | 0                          | 0                   | 0        | 0                 | 0       | 0         | 0            | 0   | 0   | 0        | 0        | 0       | 0      | 0    | 0    | 0          | 0      | 0    |
| Non-iron metals            | 40         | 230             | 2    | 0                | 0    | 0                          | 0                   | 0        | 0                 | 0       | 0         | 0            | 0   | 0   | 0        | 0        | 0       | 0      | 0    | 0    | 0          | 0      | 0    |
| Iron                       | 19         | 36              | 313  | 0                | 0    | 0                          | 0                   | 0        | 0                 | 0       | 0         | 0            | 0   | 0   | 0        | 0        | 0       | 0      | 0    | 0    | 0          | 0      | 0    |
| Other non-metals           | 0          | 0               | 0    | 89               | 25   | 0                          | 0                   | 0        | 0                 | 0       | 0         | 0            | 0   | 0   | 0        | 0        | 0       | 0      | 0    | 0    | 0          | 0      | 0    |
| Coal                       | 0          | 0               | 0    | 15               | 79   | 0                          | 0                   | 0        | 0                 | 0       | 0         | 0            | 0   | 0   | 0        | 0        | 0       | 0      | 0    | 0    | 0          | 0      | 0    |
| Chalcophile-related metals | 0          | 0               | 0    | 0                | 0    | 67                         | 1                   | 1        | 1                 | 0       | 0         | 0            | 1   | 0   | 0        | 0        | 0       | 0      | 0    | 0    | 0          | 0      | 0    |
| Aluminium (Bauxite)        | 0          | 0               | 0    | 0                | 0    | 5                          | 103                 | 0        | 0                 | 0       | 0         | 0            | 0   | 0   | 0        | 0        | 0       | 0      | 0    | 0    | 0          | 0      | 0    |
| Chromium                   | 0          | 0               | 0    | 0                | 0    | 1                          | 0                   | 101      | 0                 | 0       | 1         | 2            | 0   | 0   | 0        | 0        | 0       | 0      | 0    | 0    | 0          | 0      | 0    |
| Nickel and Cobalt          | 0          | 0               | 0    | 0                | 0    | 9                          | 0                   | 0        | 98                | 0       | 9         | 0            | 1   | 0   | 0        | 0        | 0       | 0      | 0    | 0    | 0          | 0      | 0    |
| Lithium                    | 0          | 0               | 0    | 0                | 0    | 1                          | 0                   | 0        | 0                 | 104     | 1         | 0            | 0   | 0   | 0        | 0        | 0       | 0      | 0    | 0    | 0          | 0      | 0    |
| Manganese                  | 0          | 0               | 0    | 0                | 0    | 3                          | 0                   | 0        | 1                 | 0       | 100       | 0            | 1   | 1   | 0        | 0        | 0       | 0      | 0    | 0    | 0          | 0      | 0    |
| Other metals               | 0          | 0               | 0    | 0                | 0    | 6                          | 0                   | 0        | 1                 | 0       | 6         | 102          | 0   | 0   | 0        | 0        | 0       | 0      | 0    | 0    | 0          | 0      | 0    |
| PGE                        | 0          | 0               | 0    | 0                | 0    | 2                          | 0                   | 2        | 1                 | 0       | 2         | 0            | 101 | 0   | 0        | 0        | 1       | 0      | 0    | 0    | 0          | 0      | 0    |
| Tin                        | 0          | 0               | 0    | 0                | 0    | 2                          | 0                   | 1        | 0                 | 0       | 0         | 0            | 0   | 103 | 0        | 0        | 0       | 0      | 0    | 0    | 0          | 0      | 0    |
| Ilmenite                   | 0          | 0               | 0    | 0                | 0    | 2                          | 0                   | 0        | 1                 | 0       | 2         | 0            | 0   | 0   | 104      | 0        | 0       | 0      | 0    | 0    | 0          | 0      | 0    |
| Tungsten                   | 0          | 0               | 0    | 0                | 0    | 2                          | 0                   | 0        | 1                 | 0       | 0         | 0            | 0   | 0   | 0        | 104      | 1       | 0      | 0    | 0    | 0          | 0      | 0    |
| Uranium                    | 0          | 0               | 0    | 0                | 0    | 6                          | 0                   | 0        | 0                 | 0       | 0         | 0            | 0   | 0   | 0        | 0        | 101     | 0      | 0    | 0    | 0          | 0      | 0    |
| Copper                     | 0          | 0               | 0    | 0                | 0    | 0                          | 0                   | 0        | 0                 | 0       | 0         | 0            | 0   | 0   | 0        | 0        | 0       | 69     | 21   | 1    | 0          | 0      | 3    |
| Gold                       | 0          | 0               | 0    | 0                | 0    | 0                          | 0                   | 0        | 0                 | 0       | 0         | 0            | 0   | 0   | 0        | 0        | 0       | 19     | 69   | 9    | 1          | 0      | 0    |
| Lead                       | 0          | 0               | 0    | 0                | 0    | 0                          | 0                   | 0        | 0                 | 0       | 0         | 0            | 0   | 0   | 0        | 0        | 0       | 8      | 5    | 84   | 0          | 4      | 2    |
| Molybdenum                 | 0          | 0               | 0    | 0                | 0    | 0                          | 0                   | 0        | 0                 | 0       | 0         | 0            | 0   | 0   | 0        | 0        | 0       | 1      | 3    | 0    | 102        | 1      | 0    |
| Silver                     | 0          | 0               | 0    | 0                | 0    | 0                          | 0                   | 0        | 0                 | 0       | 0         | 0            | 0   | 0   | 0        | 0        | 0       | 3      | 5    | 8    | 0          | 98     | 0    |
| Zinc                       | 0          | 0               | 0    | 0                | 0    | 0                          | 0                   | 0        | 0                 | 0       | 0         | 0            | 0   | 0   | 0        | 0        | 0       | 4      | 1    | 2    | 1          | 1      | 99   |

**Table S8.5 User's Accuracy and Producer's Accuracy for 20 Commodities**

| Commodity           | User's accuracy | CI lower bound | CI upper bound | Producer's accuracy | CI lower bound | CI upper bound |
|---------------------|-----------------|----------------|----------------|---------------------|----------------|----------------|
| Iron                | 85.05%          | 81.41%         | 88.70%         | 96.31%              | 94.26%         | 98.36%         |
| Copper              | 73.40%          | 64.47%         | 82.34%         | 66.35%              | 57.26%         | 75.43%         |
| Lead                | 81.55%          | 74.06%         | 89.04%         | 80.77%              | 73.19%         | 88.34%         |
| Zinc                | 91.67%          | 86.45%         | 96.88%         | 95.19%              | 91.08%         | 99.30%         |
| Gold                | 70.41%          | 61.37%         | 79.45%         | 66.35%              | 57.26%         | 75.43%         |
| Silver              | 85.96%          | 79.59%         | 92.34%         | 94.23%              | 89.75%         | 98.71%         |
| Chromium            | 96.19%          | 92.53%         | 99.85%         | 96.19%              | 92.53%         | 99.85%         |
| Manganese           | 94.34%          | 89.94%         | 98.74%         | 82.64%              | 75.90%         | 89.39%         |
| Molybdenum          | 95.33%          | 91.33%         | 99.33%         | 98.08%              | 95.44%         | 100.00%        |
| Nickel and Cobalt   | 83.76%          | 77.08%         | 90.44%         | 94.23%              | 89.75%         | 98.71%         |
| Tin                 | 97.17%          | 94.01%         | 100.00%        | 99.04%              | 97.16%         | 100.00%        |
| Tungsten            | 96.30%          | 92.73%         | 99.86%         | 100.00%             | 96.52%         | 100.00%        |
| Aluminium (Bauxite) | 95.37%          | 91.41%         | 99.33%         | 99.04%              | 97.16%         | 100.00%        |
| Ilmenite            | 95.41%          | 91.49%         | 99.34%         | 100.00%             | 96.52%         | 100.00%        |
| Lithium             | 98.11%          | 95.52%         | 100.00%        | 100.00%             | 96.52%         | 100.00%        |
| PGE                 | 92.66%          | 87.76%         | 97.56%         | 97.12%              | 93.90%         | 100.00%        |
| Uranium             | 94.39%          | 90.03%         | 98.75%         | 98.06%              | 95.39%         | 100.00%        |
| Other metals        | 88.70%          | 82.91%         | 94.48%         | 98.08%              | 95.44%         | 100.00%        |
| Coal                | 84.04%          | 76.64%         | 91.45%         | 75.96%              | 67.75%         | 84.17%         |
| Other non-metals    | 78.07%          | 70.47%         | 85.67%         | 85.58%              | 78.82%         | 92.33%         |
| Overall accuracy    |                 |                |                |                     |                |                |
| Accuracy            | CI lower bound  |                |                | CI upper bound      |                |                |
| 87.32%              | 86.15%          |                |                | 88.50%              |                |                |

**Table S8.6a Commodity Classification Result (Polygons)**

| Commodity           | Polygons (n) |         |           |           | Prop (Total) |
|---------------------|--------------|---------|-----------|-----------|--------------|
|                     | Total        | Trained | Predicted | Connected |              |
| Iron                | 5484         | 195     | 4946      | 343       | 14.29%       |
| Copper              | 2427         | 264     | 1962      | 201       | 6.33%        |
| Lead                | 1182         | 93      | 1015      | 74        | 3.08%        |
| Zinc                | 437          | 13      | 399       | 25        | 1.14%        |
| Gold                | 5021         | 528     | 4219      | 274       | 13.09%       |
| Silver              | 832          | 57      | 712       | 63        | 2.17%        |
| Chromium            | 216          | 12      | 189       | 15        | 0.56%        |
| Manganese           | 1039         | 13      | 963       | 63        | 2.71%        |
| Molybdenum          | 399          | 26      | 347       | 26        | 1.04%        |
| Nickel and Cobalt   | 2112         | 64      | 1919      | 129       | 5.50%        |
| Tin                 | 208          | 4       | 183       | 21        | 0.54%        |
| Tungsten            | 187          | 5       | 172       | 10        | 0.49%        |
| Aluminium (Bauxite) | 890          | 42      | 810       | 38        | 2.32%        |
| Ilmenite            | 619          | 7       | 574       | 38        | 1.61%        |
| Lithium             | 726          | 7       | 683       | 36        | 1.89%        |
| PGE                 | 766          | 34      | 678       | 54        | 2.00%        |
| Uranium             | 925          | 26      | 858       | 41        | 2.41%        |
| Other metals        | 721          | 15      | 667       | 39        | 1.88%        |
| Coal                | 10553        | 386     | 9462      | 705       | 27.50%       |
| Other non-metals    | 3626         | 150     | 3303      | 173       | 9.45%        |
| ALL                 | 38370        | 1941    | 34061     | 2368      | 100.00%      |



**Table S8.6b Commodity Classification Result (Areas)**

| Commodity           | Area (Km <sup>2</sup> ) |                 |                 |               | Prop (Total)   |
|---------------------|-------------------------|-----------------|-----------------|---------------|----------------|
|                     | Total                   | Trained         | Predicted       | Connected     |                |
| Iron                | 10160.24                | 3074.23         | 7006.56         | 79.45         | 10.21%         |
| Copper              | 8429.79                 | 4564.76         | 3799.22         | 65.81         | 8.47%          |
| Lead                | 2651.65                 | 314.73          | 2326.16         | 10.75         | 2.67%          |
| Zinc                | 989.25                  | 137.12          | 848.90          | 3.23          | 0.99%          |
| Gold                | 18143.97                | 8429.68         | 9600.91         | 113.38        | 18.24%         |
| Silver              | 920.94                  | 169.18          | 741.31          | 10.45         | 0.93%          |
| Chromium            | 572.06                  | 51.44           | 519.95          | 0.67          | 0.57%          |
| Manganese           | 1912.96                 | 142.98          | 1759.93         | 10.05         | 1.92%          |
| Molybdenum          | 740.22                  | 155.42          | 572.31          | 12.49         | 0.74%          |
| Nickel and Cobalt   | 4102.65                 | 560.87          | 3507.94         | 33.84         | 4.12%          |
| Tin                 | 462.11                  | 87.53           | 354.76          | 19.82         | 0.46%          |
| Tungsten            | 364.91                  | 4.47            | 357.72          | 2.72          | 0.37%          |
| Aluminium (Bauxite) | 2654.42                 | 928.33          | 1679.19         | 46.90         | 2.67%          |
| Ilmenite            | 840.60                  | 70.12           | 766.64          | 3.84          | 0.84%          |
| Lithium             | 1687.42                 | 65.41           | 1610.74         | 11.27         | 1.70%          |
| PGE                 | 1250.69                 | 169.85          | 1074.19         | 6.65          | 1.26%          |
| Uranium             | 2217.32                 | 227.62          | 1981.81         | 7.89          | 2.23%          |
| Other metals        | 1534.72                 | 326.11          | 1198.63         | 9.98          | 1.54%          |
| Coal                | 28948.63                | 7224.28         | 21315.80        | 408.55        | 29.10%         |
| Other non-metals    | 10908.44                | 4186.71         | 6661.93         | 59.80         | 10.96%         |
| <b>ALL</b>          | <b>99492.95</b>         | <b>30890.83</b> | <b>67684.58</b> | <b>917.54</b> | <b>100.00%</b> |

**Table S8.7 External Validation Results for Selected Commodities**

| Commodity                             | Mine points (n)  |                         |          | Areas (km <sup>2</sup> ) |                        |          |
|---------------------------------------|------------------|-------------------------|----------|--------------------------|------------------------|----------|
|                                       | Consistent areas | All intersecting points | Accuracy | Consistent areas         | All intersecting areas | Accuracy |
| Iron                                  | 175              | 330                     | 53%      | 2728                     | 3623                   | 75%      |
| Copper                                | 140              | 195                     | 72%      | 3496                     | 3711                   | 94%      |
| Lead-zinc (compared to lead and zinc) | 78               | 113                     | 69%      | 461                      | 567                    | 81%      |
| Nickel (compared to nickel-cobalt)    | 125              | 160                     | 78%      | 3485                     | 3671                   | 95%      |
| Coal                                  | 423              | 721                     | 59%      | 6693                     | 9529                   | 70%      |

## References

1. Maus, V. *et al.* A global-scale dataset of mining areas. *Sci. Data* **7**, 289 (2020). <https://doi.org/10.1038/s41597-020-00624-w>.
2. Maus, V. *et al.* An update on global mining land use. *Sci. Data* **9**, 433 (2022). <https://doi.org/10.1038/s41597-022-01547-4>.
3. S&P Global Market Intelligence. SNL metals & mining data. (2023).
4. U.S. Geological Survey. Major mineral deposits of the world: Regional locations and general geologic setting of known deposits of major nonfuel mineral commodities [Dataset]. (2005). <https://mrdata.usgs.gov/services/ofr20051294>.
5. Jasansky, S., Lieber, M., Giljum, S. & Maus, V. An open database on global coal and metal mine production. *Sci. Data* **10**, 52 (2023).
6. Franks, D. M. *et al.* Tailings facility disclosures reveal stability risks. *Sci. Rep.* **11**, 5353 (2021). <https://doi.org/10.1038/s41598-021-84722-w>.
7. Tang, L. & Werner, T. T. Global mining footprint mapped from high-resolution satellite imagery. *Commun. Earth Environ.* **4**, 134 (2023). <https://doi.org/10.1038/s43247-023-00691-6>.
8. Breiman, L. Random forests. *Mach. Learn.* **45**, 5–32 (2001).
9. Hall, D. K., Riggs, G. A. & Salomonson, V. V. Development of methods for mapping global snow cover using Moderate Resolution Imaging Spectroradiometer data. *Remote Sens. Environ.* **54**, 127–140 (1989).
10. Werner, F. *et al.* Marine boundary layer cloud property retrievals from high-resolution ASTER observations: case studies and comparison with Terra MODIS. *Atmos. Meas. Tech.* **9**, 5869–5894 (2016). <https://doi.org/10.5194/amt-9-5869-2016>.
11. Pekel, J.-F., Cottam, A., Gorelick, N. & Belward, A. S. High-resolution mapping of global surface water and its long-term changes. *Nature* **540**, 418–422 (2016). <https://doi.org/10.1038/nature20584>.

12. Kalinowski, A. & Oliver, S. ASTER mineral index processing manual. (Geoscience Australia, 2004). <https://www.ga.gov.au/bigobj/GA7833.pdf>.
13. Global Energy Monitor. Global Iron Ore Mines Tracker (V1). November 2024. Available at: <https://globalenergymonitor.org>.
14. Global Energy Monitor. Global Coal Mine Tracker. April 2024 release. Global Energy Monitor, 2024. Available at: <https://globalenergymonitor.org>.
15. Northey, S. A., Mudd, G. M., Werner, T. T., Jowitt, S. M., Haque, N., Yellishetty, M., & Weng, Z. The exposure of global base metal resources to water criticality, scarcity and climate change. *Global Environmental Change* **44**, 109–124 (2017). <https://doi.org/10.1016/j.gloenvcha.2017.04.004>.
